# Principles that govern competition or co-existence in Rho-GTPase driven polarization.

Jian-geng Chiou<sup>1</sup>, Timothy C. Elston<sup>2</sup>, Thomas P. Witelski<sup>3</sup>, David G. Schaeffer<sup>3</sup>, Daniel J. Lew<sup>1\*</sup>

\*For correspondence:  
[daniel.lew@duke.edu](mailto:daniel.lew@duke.edu) (DJL)

<sup>1</sup>Department of Pharmacology and Cancer Biology, Duke University Medical Center, Durham, NC 27710, USA; <sup>2</sup>Department of Pharmacology, University of North Carolina at Chapel Hill, Chapel Hill, NC 27599, USA; <sup>3</sup>Department of Mathematics, Duke University, Durham, NC 27708, USA

**Abstract** Rho-GTPases are master regulators of polarity establishment and cell morphology. Positive feedback enables concentration of Rho-GTPases into clusters at the cell cortex, from where they regulate the cytoskeleton. Different cell types reproducibly generate either one (e.g. the front of a migrating cell) or several clusters (e.g. the multiple dendrites of a neuron), but the mechanistic basis for uni-polar or multi-polar outcomes is unclear. The design principles of Rho-GTPase circuits are captured by reaction-diffusion models based on conserved aspects of Rho-GTPase biochemistry. Some such models display rapid winner-takes-all competition between clusters, yielding a unipolar outcome. Other models allow prolonged co-existence of clusters. We derive a “saturation rule” general to all relevant models that governs the timescale of competition, and thereby predicts whether the system will generate uni-polar or multi-polar outcomes. We suggest that the saturation rule is a fundamental property of the Rho-GTPase polarity machinery, regardless of the specific feedback mechanism.

## Introduction

Complex cell morphologies arise, in part, through the specialization of cortical domains (e.g., the apical and basal domains of epithelial cells, or the front and back of migratory cells). Elaboration of such domains involves the local accumulation of active Rho-family GTPases, which regulate cytoskeletal elements to promote specific downstream events, such as vesicle trafficking, membrane deformation, or directed growth (*Caceres et al., 2012; Etienne-Manneville and Hall, 2002; Yang, 2008*). For some cells, it is vital to establish a single specialized domain (e.g. the front of a migrating cell), whereas others require the establishment of multiple domains simultaneously (e.g. the dendrites of a neuron) (*Dotti et al., 1988; Wu and Lew, 2013*). The mechanistic basis for specifying uni- or multi-polar outcomes remains elusive.

Rho-family GTPases switch between GTP-bound active and GDP-bound inactive forms (*Figure 1A*). Active GTPases are tethered to the inner surface of the plasma membrane, where diffusion is slow. In contrast, inactive GTPases are preferentially bound by guanine nucleotide dissociation inhibitors (GDIs), which extract the bound GTPase to the cytoplasm, where their diffusion is comparatively fast. Activated GTPases can promote local activation of cytosolic GTPases via positive feedback. This generates a membrane domain with concentrated active GTPase, concomitantly depleting the cytosolic GTPase pool (*Figure 1B*). Synthesis and degradation of GTPases occurs on a slow

41 timescale compared to activation and inactivation (for example, in budding yeast the Rho-GTPase of  
42 Cdc42 polarizes within 2 minutes but has a half-life of more than 20 hours) (*Gladfelter et al., 2001*;  
43 *Howell et al., 2009*; *Wedlich-Soldner et al., 2004*). Thus, the general dynamics of the system can be  
44 captured by mass-conserved activator-substrate (MCAS) models, with a slowly-diffusing activator  
45 and a rapidly-diffusing substrate (*Figure 1C*) (*Goryachev and Pokhilko, 2008*; *Mori et al., 2008*;  
46 *Otsuji et al., 2007*). Such models can generate local peaks of activator, reflecting the establishment  
47 of a polarized concentration profile of active GTPase (*Figure 1D*).

48 Proposed MCAS models differ primarily in the formulation of the positive feedback mechanism.  
49 One set of models yields Turing instability (*Goryachev and Pokhilko, 2008*; *Otsuji et al., 2007*), where  
50 positive feedback is sufficient to amplify molecular-level fluctuations leading to peak formation.  
51 Classically, Turing systems can generate single or multiple peaks (*Gierer and Meinhardt, 1972*;  
52 *Turing, 1952*), depending on whether the size of the modeled domain is larger than a characteristic  
53 wavelength dependent on the reaction and diffusion parameters. However, even when multiple  
54 peaks emerge from the homogeneous state, most of the peaks in Turing-type MCAS models  
55 eventually disappear through a process called “competition”, leaving a single large peak as the  
56 winner (*Howell et al., 2012*; *Otsuji et al., 2007*; *Wu et al., 2015*). *Otsuji et al. (2007)* reasoned  
57 that competition arose due to mass-conservation, and further suggested that this might be a  
58 general behavior of Turing-type MCAS models. In biological systems, competition-like behavior  
59 was observed during polarity establishment in yeast cells, where it was suggested to underlie the  
60 growth of only one bud per cell cycle (*Howell et al., 2012, 2009*; *Wu et al., 2015*).

61 Another set of models relies on bistable reaction kinetics to produce “wave-pinning” behavior  
62 (*Beta et al., 2008*; *Mori et al., 2008, 2011*; *Ozbudak et al., 2005*). Such models can generate mem-  
63 brane domains with separate phases of uniform high or low activator concentrations connected  
64 by a sharp “wavefront”. The wave front spreads laterally but eventually stops (gets pinned) due to  
65 depletion of the cytoplasmic substrate, forming stable flat-topped mesa-like concentration profiles.  
66 In the absence of spatial cues, wave-pinning models can generate multiple mesas when initiated  
67 by random fluctuations (*Mori et al., 2008*). Multiple mesas in the wave-pinning model appear to  
68 be “meta-stable” (*Jilkine and Edelstein-Keshet, 2011*; *Mori et al., 2011*) and do not readily exhibit  
69 competition.

70 An attractive hypothesis for why some cells are uni-polar and others multi-polar would be that  
71 these behaviors arise from differences in the biochemical mechanisms of positive feedback, yielding  
72 competition in Turing-type or meta-stability in wave-pinning models. However, some Turing-type  
73 MCAS models appear to switch to multi-polarity when domain size (*Jilkine and Edelstein-Keshet,*  
74 *2011*; *Otsuji et al., 2007*) or protein amount (*Howell et al., 2012*) is increased. Thus, it could be that  
75 parameter values (protein concentration, catalytic activity, cell size, etc.) rather than regulatory  
76 feedback mechanisms dictate whether uni- and multi- polar outcomes are observed.

77 Here, we investigate the transient multi-peak scenario, and show that both wave-pinning and  
78 Turing-type models are capable of generating uni- or multi-polar outcomes. The switch between uni-  
79 and multi-polarity is primarily dictated by a “saturation rule” that is general to MCAS models: Every  
80 biologically relevant model has an innate saturation point that sets the maximum local Rho-GTPase  
81 concentration. When peaks form such that peak concentrations are well below this saturation  
82 point, competition is effective and multi-polar conditions resolve rapidly to a uni-polar steady state.  
83 However, if the GTPase concentration in two or more peaks approaches the saturation point, then  
84 competition becomes ineffective, and the peaks become meta-stable. Because the saturation rule  
85 does not depend on the specifics of the biochemical reactions, our results yield general and testable  
86 predictions.

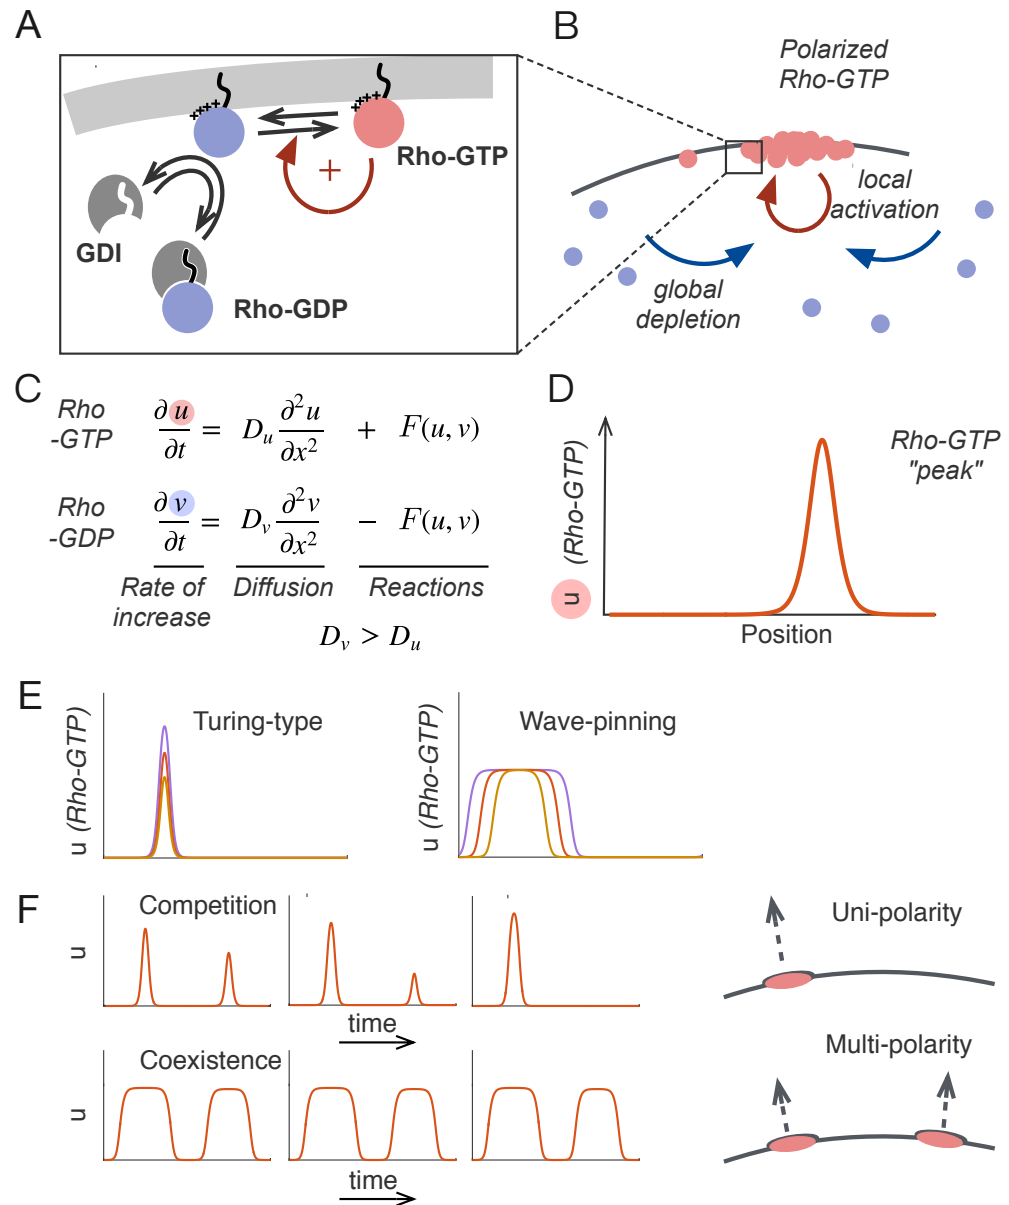

**Figure 1. Polarity establishment and competition in mass conserved activator-substrate (MCAS) models.**

A) Rho-GTPases are tethered to the plasma membrane by prenylation. The inactive GDP-bound form, or “substrate”, is preferentially bound by the GDI, masking the prenyl group and extracting the substrate to the cytoplasm. The active GTP-bound form, or “activator”, promotes local activation of more substrate, yielding positive feedback. B) Local activation via positive feedback and depletion of the substrate in the cytosol generates an activator-enriched domain on the cortex. C) The interconversions of Rho-GTPases between active and inactive forms can be modeled as a system of two reaction-diffusion equations governing the dynamics of the slowly-diffusing activator  $u$  and the rapidly-diffusing substrate  $v$ . The model is mass-conserved: generation of  $u$  is precisely matched by consumption of  $v$  (and vice versa) in the reaction term  $F(u, v)$ . D) MCAS models generate peaks in the profile of  $u$ , representing concentrated active Rho-GTPase on the membrane. E) Turing-type models (Equation 4) can generate sharp peaks of different heights, while wave-pinning models (Equation 5) can generate flat-topped mesas of different width, when total Rho-GTPase content  $M$  increases.  $M = 4, 6, 10$  for Turing-type model and  $M = 30, 40, 50$  for wave-pinning model. F) When two peaks of unequal size form in Turing-type models, they compete rapidly and resolve to a single peak, whereas two mesas of unequal size in Wave-pinning models are meta-stable. Parameter values are  $a = 1 \mu\text{m}^2$ ,  $b = 1 \text{s}^{-1}$  and  $D_u = 0.01 \mu\text{m}^2\text{s}^{-1}$ ,  $D_v = 1 \mu\text{m}^2\text{s}^{-1}$  for both models, and  $k = 1 \mu\text{m}^2$  for wave-pinning model. All models were simulated on domain size  $L = 10 \mu\text{m}$ .

## 87 Results

### 88 MCAS model behaviors

89 Two-species MCAS systems consist of two partial differential equations (PDEs), governing the  
90 dynamics of a slowly diffusing activator (GTP-bound GTPase at the membrane)  $u$ , and a rapidly  
91 diffusing substrate (GDP-bound GTPase in the cytoplasm)  $v$ . In one spatial dimension, these systems  
92 take the general form:

$$\frac{\partial u}{\partial t} = D_u \frac{\partial^2 u}{\partial x^2} + F(u, v) \quad (1a)$$

$$\frac{\partial v}{\partial t} = D_v \frac{\partial^2 v}{\partial x^2} - F(u, v) \quad (1b)$$

93 where the dynamics of  $u$  and  $v$  are governed by a diffusion term and a reaction term,  $F(u, v)$ . To  
94 reflect the different compartments (membrane and cytoplasm) populated by the different species,  
95 the diffusion constant of  $u$ ,  $D_u$ , is typically two orders of magnitude smaller than  $D_v$ , so that  $u$   
96 spreads much more slowly than  $v$ .  $F(u, v)$  describes the biochemical interconversions between  $u$   
97 and  $v$ .

$$F(u, v) = f(u)v - g(u) \quad (2)$$

98 For GTPases, the inactive form of the GTPase  $v$  is converted to the active form  $u$  through the  
99 action of guanine nucleotide exchange factors (GEFs)  $f(u)$ , while  $u$  is converted to  $v$  through the  
100 action of GTPase activating proteins (GAPs)  $g(u)$ . The functions  $f(u)$  and  $g(u)$  take into account  
101 potential positive feedback mediated by the active GTPase. Because the inactive GTPase is not  
102 thought to participate in biochemical reactions other than as a substrate to produce active GTPase,  
103 under the assumption of mass action kinetics  $v$  appears only in the activation term. As the model  
104 assumes only the exchange between  $u$  and  $v$ , but not synthesis or degradation of either, the system  
105 is mass-conserved, so that the total abundance of the GTPase  $M = \int (u + v) dx$  is a constant over  
106 time.

107 Generation of a GTPase-enriched domain in MCAS models occurs through positive feedback  
108 leading to local accumulation of the activator,  $u$ , and concomitant depletion of the substrate,  $v$ .  
109 Locally depleted  $v$  is quickly resupplied from the whole cytoplasm due to its high mobility, resulting  
110 in a global depletion of  $v$ . This reduces the net rate,  $F(u, v)$ , at which fresh  $u$  is generated (**Equation 2**),  
111 impeding further growth of the  $u$ -enriched domain, and the system reaches a steady state. At  
112 steady state, reaction and diffusion must be balanced at all local positions  $x$ :

$$0 = D_u \frac{\partial^2 u}{\partial x^2} + F(u, v) \quad (3a)$$

$$0 = D_v \frac{\partial^2 v}{\partial x^2} - F(u, v) \quad (3b)$$

113 Given a total protein content  $M$ , these equations govern the steady state peak shape  $u(x)$  and  
114 substrate level  $v(x)$  for a single peak in an MCAS model (Further discussed in **Box 1** and Methods  
115 section).

116 Positive feedback can occur through  $f(u)$  (i.e. active GTPase locally stimulates GEF activity) or  $g(u)$   
117 (i.e. active GTPase locally inhibits GAP activity). Examples of feedback via GEF activation include the  
118 simple Turing-type model  $f(u) = au^2$ ,  $g(u) = bu$ , Goryachev's simplified model  $f(u) = au^2 + cu$ ,  $g(u) = bu$   
119 (**Goryachev and Pokhilko, 2008**), and Mori's wave-pinning model  $f(u) = \frac{au^2}{1+ku^2}$ ,  $g(u) = bu$  (**Mori et al.,**  
120 **2008**). Examples of feedback via GAP inhibition include  $f(u) = 1$ ,  $g(u) = \frac{bu}{(1+u)^2}$ , which resembles  
121 model I in (**Otsuji et al., 2007**). To illustrate the behaviors of different MCAS models, we simulated  
122 examples of Turing-type and wave-pinning MCAS models:

$$F(u, v) = au^2v - bu \quad (4)$$

$$F(u, v) = \frac{au^2}{1 + ku^2}v - bu \quad (5)$$

123 With the appropriate choice of parameters, the Turing-type model (**Equation 4**) yields a peak  
124 given any spatial perturbation of the homogeneous steady state, while the wave-pinning model  
125 (**Equation 5**) requires a supra-threshold perturbation to destabilize the homogeneous state. The  
126 Turing-type model yields a sharp peak at steady state, while the wave-pinning model yields a flat-  
127 topped mesa (**Figure 1E**). Simulations with greater total amounts of GTPase  $M$  yield higher peaks in  
128 the Turing-type model, but broader mesas (with the same peak height) in the wave-pinning model  
129 (**Figure 1E**), and simulations initiated with two unequal peaks yield rapid competition in the Turing-  
130 type model but apparent co-existence in the wave-pinning model (**Figure 1F**). These behaviors  
131 are all consistent with previous reports (**Mori et al., 2008, 2011; Otsuji et al., 2007; Ozbudak et al.,**  
132 **2005**). To understand these different behaviors, we first revisit the basis for competition.

### 133 **Competition between peaks arises from a difference in the ability of unequal peaks** 134 **to recruit cytoplasmic GTPase.**

135 When two unequal peaks are present in the same domain, each peak recruits GTPase from  
136 the cytoplasm, thereby globally depleting cytoplasmic GTPase. As exchange of GTPase between  
137 each peak and the cytoplasm is dynamic, the two peaks are effectively recruiting GTPase from one  
138 another. If the larger peak (the one that contains more GTPase) recruits GTPase more effectively, it  
139 will grow at the expense of the smaller peak, eventually yielding a uni-polar outcome (**Figure 2A,**  
140 **scenario 1**). If instead, the smaller peak recruits GTPase more effectively, then it will grow while  
141 the larger peak shrinks, eventually yielding two equal peaks, as observed in some more complex  
142 models (**Howell et al., 2012**) (**Figure 2A, scenario 2**). If two unequal peaks recruit GTPase equally,  
143 then the two unequal peaks would simply coexist (**Figure 2A, scenario 3**).

144 To understand how these considerations play out for different peaks, we need to know which  
145 peak will recruit more GTPase. To assess how much GTPase would be recruited to a specific peak,  
146 consider first the Turing-type model (**Equation 4**) in the limit  $D_v \rightarrow \infty$ . This model combines a  
147 quadratic (in  $u$ ) activation term with a linear inactivation term (**Figure 2B**). Thus, for a fixed value  
148 of  $v$ , there are two values of  $u$  at which activation and inactivation balance each other precisely  
149 (i.e. fixed points of the net activation curve  $F(u, v)$ , **Figure 2C**). Given the concentration profile of a  
150 peak (**Figure 2D, upper panel**),  $F(u, v)$  determines whether any given location on the membrane will  
151 gain GTPase from the cytoplasm or lose GTPase to the cytoplasm (**Figure 2D, lower panel**). At the  
152 trough in **Figure 2D** ( $u_{\min}$ ),  $u$  approaches the lower fixed point of  $F(u, v)$ , yielding no net gain or loss of  
153 GTPase. On the lower flanks of the peak,  $u$  values lie between the two fixed points, and inactivation  
154 outpaces activation, so there is a net loss of  $u$  (**Figure 2B, C and D**). When  $u$  rises above the higher  
155 fixed point of  $F(u, v)$ , up until the top of the peak ( $u_{\max}$ ), there is net recruitment of GTPase from  
156 the cytoplasm (**Figure 2B, C, and D**). At steady state, the net loss from  $u_{\min}$  to the higher fixed point  
157 (blue area in **Figure 2B, C**) is balanced by the net recruitment from the higher fixed point to  $u_{\max}$   
158 (red area in **Figure 2B, C, Box 1**). Additionally, diffusion from the center of the peak to the flanks  
159 balances these flows of GTPase, requiring a sharp-topped peak (where negative  $\frac{\partial^2 u}{\partial x^2}$  counteracts net  
160 recruitment at the center: **Equation 3**) (**Figure 2D**). We could generate a larger peak by increasing  
161 the total GTPase content ( $M$ ) of the system: positive feedback would then drive more GTPase into  
162 the peak, so  $u_{\max}$  would increase to yield greater net activation in the center of the peak, resulting in  
163 more severe depletion of cytoplasmic  $v$  and hence shifting  $F(u, v)$  (**Figure 2E**). At steady state, the  
164 red and the blue areas (though each larger than for the smaller peak) would once again be equal.

221 Now consider a scenario in which two unequal peaks are present in the same domain. Both  
222 peaks would grow until cytoplasmic  $v$  becomes sufficiently depleted. In the limit where  $D_v \rightarrow \infty$ ,  $v$   
223 will reach this concentration,  $v^*$ , throughout the cytoplasm shared by both peaks. Therefore, the  
224 same net reaction curve will apply to both peaks, but they will have a different  $u_{\max}$  (**Figure 2F**). The  
225 overall recruitment or loss of GTPase for each peak  $u(x)$  sharing a common  $v^*$  is given by:

$$\int F(u, v^*) dx \quad (9)$$

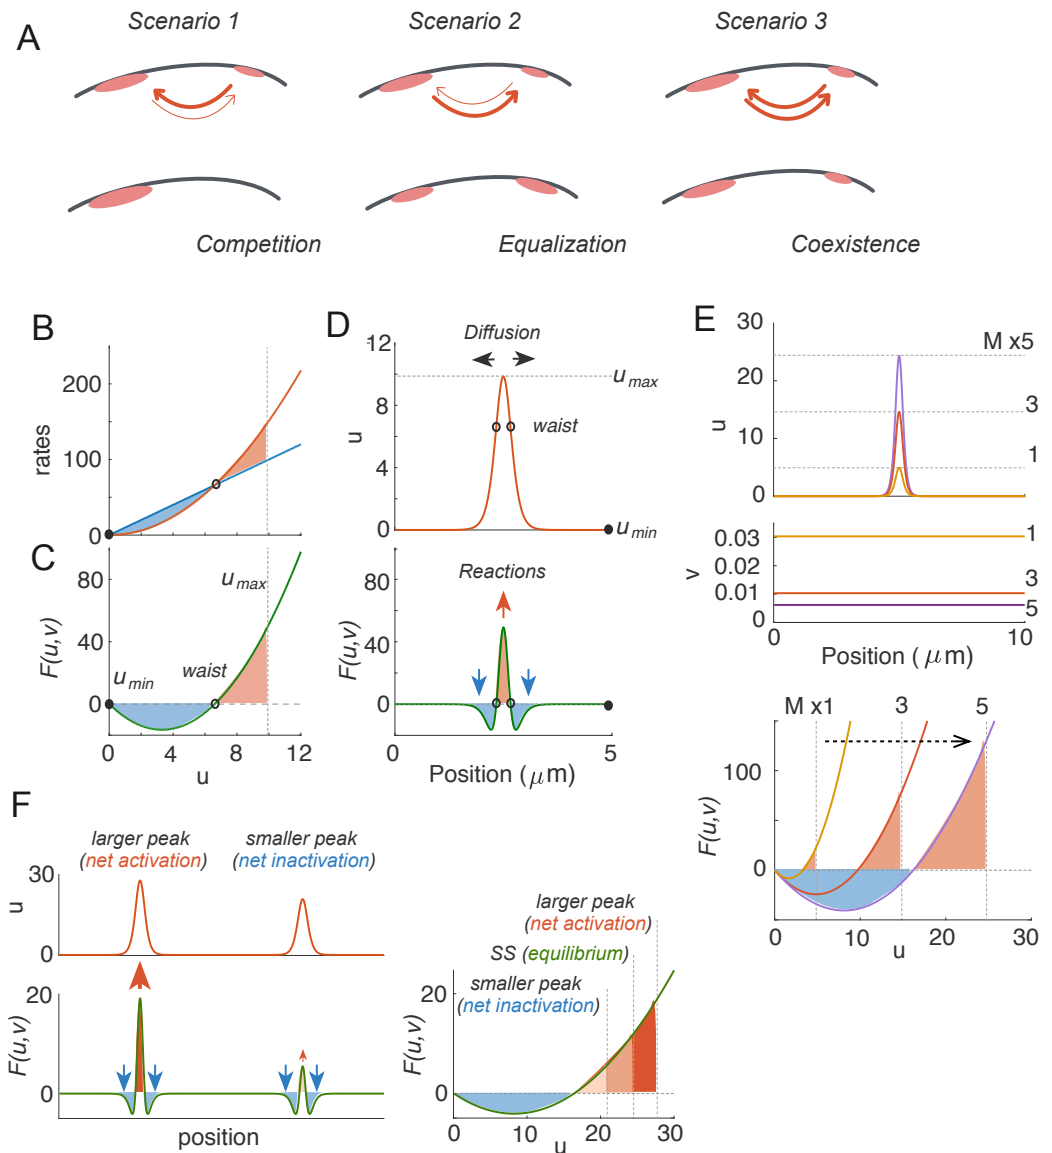

**Figure 2. The basis for competition.**

A) Possible outcomes when there are two unequal clusters of Rho-GTPase in the same cell. Scenario 1: competition occurs if larger clusters recruit GTPase more efficiently than smaller clusters. Scenario 2: equalization occurs if smaller clusters recruit GTPase more efficiently than larger clusters. Scenario 3: co-existence occurs if both clusters recruit GTPase equally well. B-F: Turing-type model with  $D_v \rightarrow \infty$ . B) Rate balance plot: activation and inactivation rates are balanced at two fixed points of  $F(u, v)$ . Filled circle indicates stable fixed point, and empty circle indicates unstable fixed point. C) Net activation (shaded red) and net inactivation (shaded blue) from the trough ( $u_{\min}$ ) to the top ( $u_{\max}$ ) of the peak must be balanced at steady state (**Box 1**). This determines the peak height ( $u_{\max}$ ). D) Net activation at the center of the peak is balanced by diffusion, which drives GTPase towards the flanks, where there is net inactivation. E) If total GTPase content is raised, the model generates higher peaks (larger  $u_{\max}$ ), accompanied by more severely depleted  $v$ , which lowers  $F(u, v)$  such that the blue and red shaded areas are once again balanced. F) When two peaks are present, they share the same  $v$  and hence the same  $F(u, v)$  curve. The larger peak will always have excess net activation, and the smaller peak will always have excess net inactivation, so competition is inevitable. Parameter values used:  $a = 1 \mu\text{m}^2$ ,  $b = 1 \text{s}^{-1}$  and  $D_u = 0.01 \mu\text{m}^2\text{s}^{-1}$ ,  $D_v = \infty$ . All models were simulated on domain size  $L = 10 \mu\text{m}$ .

165

## Box 1. Intuitive description of the steady state solutions by analogy to Newtonian physics.

166

168

169

170

171

172

173

174

175

A steady state is reached when the three fluxes, diffusion, activation (conversion of  $v$  to  $u$ ) and inactivation (conversion of  $u$  to  $v$ ), reach equilibrium at all spatial positions (**Equation 3**). To satisfy this condition, the total difference between the activation and inactivation curves (area shaded from the bottom to the top of the peak in **Figure 2B-E**) is zero. This can be understood as follows.

First, at steady state, we can rewrite **Equation 3a** in the form

176

$$-F(u, v) = D_u \frac{d^2 u}{dx^2} \quad (6)$$

177

178

179

180

181

182

183

In the general scenario  $D_v < \infty$ ,  $v = -D_u/D_v + q$  (**Equation 11**), where  $q$  is a constant representing the basal substrate level. In the limit  $D_v \rightarrow \infty$ ,  $v = q$ .

This equation (**Equation 6**) has the same form as Newton's second law  $F = ma$ , where  $-F(u, q)$  is analogous to the force,  $D_u$  is analogous to the mass,  $u$  is analogous to the position, and "x" is analogous to time. The relationship between the "force" and the "position" ( $u$ ) is governed by  $-F(u, q)$ . Equivalent to this equation is the condition for conservation of energy,

184

$$H = \int D_u \frac{d^2 u}{dx^2} du + \int F(u, v) du \quad (7a)$$

185

186

187

$$= E_k + \Phi(u, q) \quad (7b)$$

188

189

190

191

where the constant  $H$  is the total energy and the kinetic and potential energies are defined by the relations

192

$$E_k = \frac{1}{2} D_u \left( \frac{du}{dx} \right)^2, \quad F(u, q) = \frac{\partial \Phi(u, q)}{\partial u}$$

193

194

respectively.

| A                                            |                                                          |
|----------------------------------------------|----------------------------------------------------------|
| Newton Physics                               | MCAS steady states                                       |
| $t$                                          | time $x$                                                 |
| $x(t)$                                       | trajectory $u(x)$                                        |
| $m$                                          | mass $D_u$                                               |
| $F(x) = m \frac{\partial^2 x}{\partial t^2}$ | force $-F(u, q) = D_u \frac{\partial^2 u}{\partial x^2}$ |
| $\Phi(x) = -\int F(x) dx$                    | Potential Energy $\Phi(u, q) = \int F(u, q) du$          |
| $H = \Phi(x) + E_k$                          | Energy Conservation $H = \Phi(u, q) + E_k$               |

195

196

197

198

199

200

201

202

203

204

The **concentration profile**  $u(x)$  is now analogous to the **spatiotemporal trajectory** of a ball rolling under gravity on a 1D potential valley defined by  $\Phi(u, q)$  (B, left panel; Video 1). When the ball is at the left edge of the valley, which corresponds to the bottom of a concentration profile ( $u_{\min}$ ), it has maximum potential energy and zero kinetic energy. As the ball rolls down, potential energy transforms into kinetic energy, until it reaches the bottom of the valley, where it has maximal kinetic energy and minimal potential energy. This corresponds to the waist of the peak in the concentration profile, where the slope of  $u$  ( $du/dx$ ) is steepest. The ball slows down as it rolls up the other side of the valley, and eventually stops at a position analogous to the top of the concentration peak ( $u_{\max}$ ).

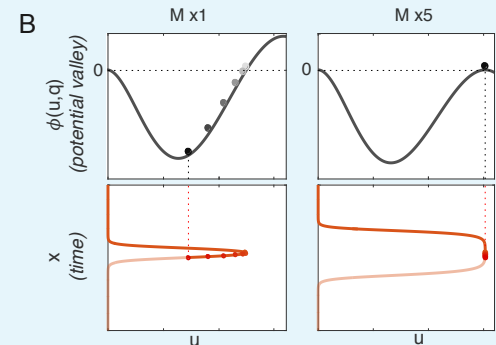

205 Due to energy conservation, the ball must reach the same level at the right edge as at the  
206 left edge of the valley. Since  $\Phi$  is the integral of  $F(u, v)$ , energy conservation in the Newtonian  
207 analogy demands that the area between the activation curve and the inactivation curve from  
208 the bottom to the top of the peak sums up to zero. This has been referred to as the "**wave-**  
209 **pinning condition**" (*Mori et al., 2008*), but applies to other MCAS models as well.  
210  
211

$$212 \int_{u_{\min}}^{u_{\max}} F(u, q) du = 0 \quad (8)$$

214 With the Newtonian analogy, it follows that the flat top of a mesa corresponds to the ball  
215 staying at  $u_{\max}$  for a long "time"  $x$ . This only occurs when the ball has just enough energy to  
216 reach the top of the potential valley (local maximum of  $\Phi$ ) on the right, where the force on the  
217 ball ( $F(u, q)$ ) approaches zero (B, right panel; Video 2). Therefore, the conditions for a mesa to  
218 occur are 1) that  $F(u, q)$  has a third fixed point, and 2) that the substrate level  $q$  is low enough  
219 so the top of the potential valley (local maximum of  $\Phi$ ) reaches the same potential as the left  
220 edge of the valley, which means that  $u_{\max}$  approaches the third fixed point of  $F(u, q)$ .

226 The higher the  $u_{\max}$  of a peak, the larger the overall recruitment, demonstrating that the larger  
227 peak has a stronger "recruitment power" than the smaller peak (*Figure 2F*). Thus, in a scenario with  
228 unequal peaks in the same domain, the larger peak experiences a net gain of GTPase, while the  
229 smaller peak experiences a net loss, further exacerbating the inequality between the two peaks  
230 until the smaller peak is eliminated. The Turing model (*Equation 4*) with  $D_v \rightarrow \infty$  always competes  
231 to yield a uni-polar endpoint (scenario 1 in *Figure 2A*).

232 The argument above requires only mass-conservation and non-linear positive feedback, which  
233 is a core requirement for polarization in general (*Gierer and Meinhardt, 1972*). Therefore, it would  
234 seem that all MCAS models should compete, regardless of the specific  $F(u, v)$ . To verify this, we  
235 generated steady states with two symmetric peaks in a domain, and performed linear stability  
236 analysis to show that such steady states are unstable (See Methods section, *Figure 9*). Perturbations  
237 that destabilize the steady state yield either competition between the peaks or merging of the peaks.  
238 Here we focus on competition. Our analysis in the limit of  $D_v \rightarrow \infty$  indicates that given sufficient  
239 time, two peaks will always compete to produce a single peak. This result does not depend on the  
240 form of  $F(u, v)$ .

### 241 **Competition slows down dramatically due to saturation.**

242 If competition (scenario 1 in *Figure 2A*) applies to all MCAS models, then why did we not observe  
243 competition in simulations of the Wave-pinning model (*Figure 1G*)? In contrast to the Turing-type  
244 model (*Equation 4*), the reaction term of the Wave-pinning model (*Equation 5*) has saturable positive  
245 feedback, introducing a third fixed point in  $F(u, v)$  (*Figure 3A*). When the total protein content in  
246 the system is small,  $u_{\max}$  does not approach this fixed point (*Figure 3B*). Under these conditions,  
247 sharp-topped peaks compete with each other to yield a uni-polar outcome, as with the Turing-type  
248 model (*Figure 3C*). But when protein content of the peak is increased,  $u_{\max}$  approaches the third  
249 fixed point, and the net activation rate  $F(u, v)$  at the top of the peak approaches zero (*Figure 3B*).  
250 To satisfy the steady-state condition (*Equation 3a*),  $\frac{\partial^2 u}{\partial x^2}$  must also approach zero. In other words,  
251 the top of the peak must broaden to become a flat-topped mesa. Once this occurs, increasing  $M$   
252 only negligibly increases  $u_{\max}$ , and instead of developing higher peaks the model develops broader  
253 mesas with comparable  $u_{\max}$  (*Figure 3B*). We shall call this maximum value the "saturation point"  
254 ( $u_{\text{sat}}$ ) of the model.

255 When  $u_{\max}$  approached the saturation point  $u_{\text{sat}}$ , simulations with two flat-topped peaks did not  
256 show obvious competition (*Figure 3D*). Applying a drastic perturbation in which 50% of the GTPase  
257 in one peak was transferred to the other led to a rapid adjustment with both peaks returning to an  
258 almost identical  $u_{\max}$  but with different peak widths, after which the unequal peaks co-existed for



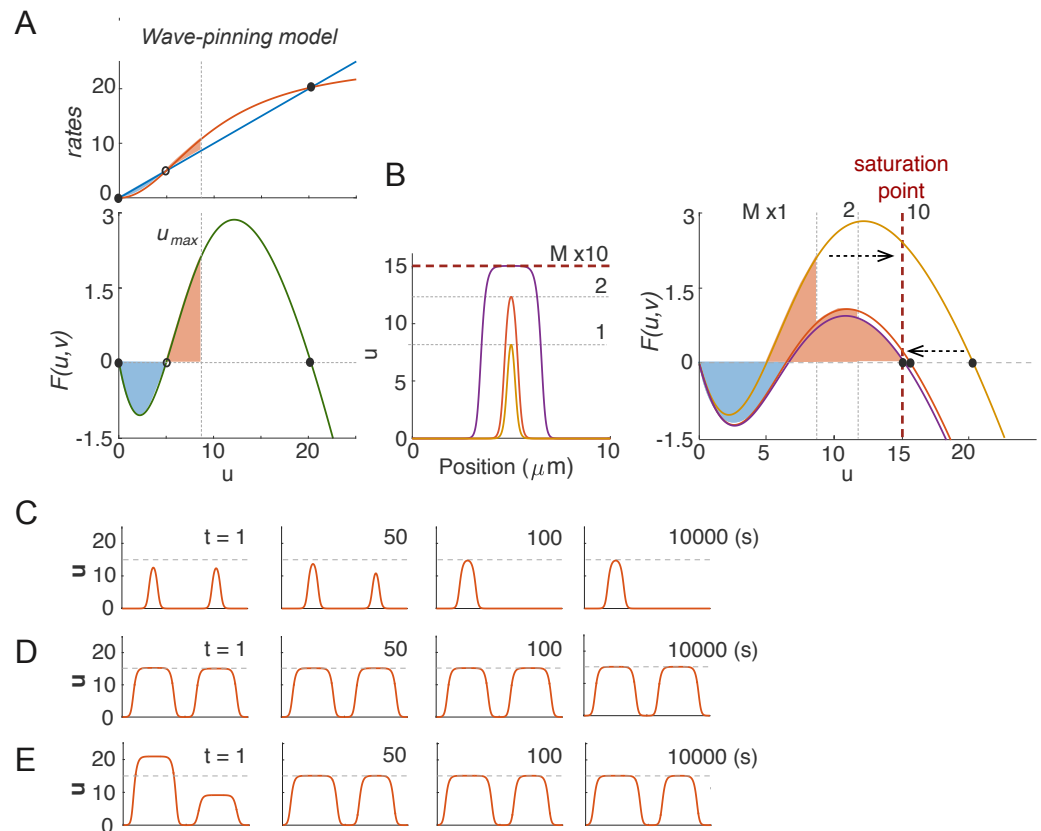

### Figure 3. Competition in Wave-pinning models.

A) The wave-pinning model has a saturable activation term, introducing a third fixed point in  $F(u, v)$ . Dashed line indicates  $u_{sat}$ . Circles indicate stable (filled) and unstable (empty) fixed points. B) As total GTPase levels  $M$  increase, the peaks get higher until  $u_{max}$  reaches the saturation point (the third fixed point), after which peaks broaden into mesas. C) With  $M = 40$ , two identical peaks were perturbed by 1% at  $t = 0$  s. The resulting competition led to a single-peak steady state within 100 s. D) With  $M = 200$ , the same 1% perturbation did not result in noticeable competition in 10000 s. E) Starting from the same two-peak steady state as in D, we introduced a large 50% perturbation. The two mesas quickly evolved back to the original  $u_{max}$ , and then persisted for 10000 s.  $k = 0.01 \mu\text{m}^2$ . Other parameters same as **Figure 2**.

259 prolonged simulation times (**Figure 3E**) (Note that the two peaks did not “equalize”: they retained  
 260 unequal total GTPase content.) Thus, the same model can yield rapid competition or competition  
 261 so slow as to yield prolonged co-existence, simply as a result of varying the total amount of GTPase  
 262 in the system.

263 To investigate more broadly how model parameters might influence the timescale of competition  
 264 between peaks, we simulated competition between two unequal peaks in the Wave-pinning model,  
 265 in the limit with  $D_v \rightarrow \infty$ . If we start with a two-peak steady state and noise, the two peaks will  
 266 eventually resolve to one, given sufficient time. As a measure of competition time that should be  
 267 insensitive to the precise degree of the noise, we tracked the time it took for unequal peaks with  
 268 active GTPase content ratio 3:2 to evolve to a content ratio of 99:1. Parameter changes caused  
 269 dramatic changes in competition times, color coded on a log scale in **Figure 4A**. Notably, increasing  
 270  $M$  always led to slower competition (**Figure 4A**, left panel). As discussed above, increasing GTPase  
 271 content causes  $u_{max}$  to approach the saturation point. Defining a saturation index in terms of how  
 272 closely  $u_{max}$  at the two-peak steady state approached the saturation point ( $(u_{sat} - u_{max})/u_{sat}$ ), we found  
 273 that the effects of varying parameters on the saturation index closely paralleled the parameter

274 effects on the timescale of competition (**Figure 4A**, right panel). A similar congruence was observed  
275 using peak width as a different measure of how closely the system approaches saturation (**Figure 4-**  
276 **Figure supplement 1**). These findings suggest that a large majority of the variation in competition  
277 times can be explained simply by the degree to which peaks in the model approach the saturation  
278 point.

279 If we plot competition time against  $u_{\max}$  normalized to the saturation point, all of the simulations  
280 with different parameter values display one of two clearly distinct behaviors (**Figure 4B**). Parameter  
281 changes can alter GTPase content in the peaks (**Figure 4A,B**, point 1 vs 2), the saturation point (point  
282 3 vs 4), or the shapes of the peaks (point 5 vs 6). In all cases, whenever  $u_{\max}$  is not close to saturation,  
283 competition occurs rapidly. Conversely, as  $u_{\max}$  approaches the saturation point, competition slows  
284 sharply and the two-peak situation becomes meta-stable, resembling the co-existence scenario 3 in  
285 **Figure 2A**.

286 The basis for the drastically slowed competition in simulations with peaks close to saturation  
287 can be intuitively understood in terms of each peak's "recruitment power" (**Equation 9**). When peaks  
288 approach saturation, unequal peaks differ in width but have almost identical  $u_{\max}$  and hence only a  
289 negligible difference in recruitment power (**Figure 4C**). At the flat tops of the peaks,  $F(u, v) = 0$ , so  
290 the peak tops (of any width) do not contribute to overall recruitment. For that reason, the extra  
291 GTPase in a broader peak does not give it a significant advantage over the narrower peak, and the  
292 driving force for competition is negligible.

293 Analysis of the eigenvalues from linear stability analysis of this system shows that the timescale  
294 of competition slows exponentially as the peaks increase in width. This conclusion, again, is general  
295 to all MCAS models and can be applied to all formulations  $F(u, v)$  that allow a third fixed point (See  
296 methods section, **Figure 9**).

### 297 **Local cytoplasmic depletion also leads to saturation and slow competition.**

298 When cytoplasmic diffusion is finite ( $D_v < \infty$ ), a saturation point emerges even if there is no  
299 explicit saturation in the reaction term. With finite  $D_v$ , increasing  $M$  in the Turing-type model  
300 (**Equation 4**) yields flat-topped peaks that become broader as  $M$  increases (**Figure 5A**), similar to  
301 that seen with the wave-pinning model (**Equation 5**).

302 To understand this behavior, recall that at steady state, **Equation 3** must hold. Adding **Equa-**  
303 **tion 3a** and **Equation 3b**, integrating and enforcing the periodic boundary condition yields a linear  
304 relationship between  $u$  and  $v$ , regardless of the reaction term:

$$v = -\frac{D_u}{D_v}u + q \quad (10)$$

305 where  $q$  is a constant over space that represents the baseline cytoplasmic level of  $v$ , due to global  
306 depletion of substrate GTPase. This reflects the fact that in addition to global substrate depletion,  
307 activation due to positive feedback depletes  $v$  locally under a peak of  $u$ , creating a "dip" in the  
308 concentration of the cytoplasmic GTPase  $v$  that corresponds to the peak of  $u$  in a linear manner  
309 (**Figure 5B**).

310 Local depletion results in an emergent saturation effect, because substituting **Equation 10** into  
311 the reaction term of the Turing type model (**Equation 4**) gives:

$$F(u, q) = au^2 \left( -\frac{D_u}{D_v}u + q \right) - bu \quad (11)$$

312 This new reaction term  $F(u, q)$  is a cubic in  $u$ , and can have three fixed points (**Figure 5C**). The upper  
313 fixed point reflects the  $u$  concentration at which local depletion of  $v$  precisely balances the net  
314 recruitment of  $u$ , yielding an emergent saturation point. Thus, even when there is no saturation  
315 inherent in the reaction term of the model, local depletion of  $v$  under the peak acts to limit local  
316 production of  $u$ , introducing a saturation effect. Given sufficient total mass  $M$ ,  $u_{\max}$  approaches this  
317 saturation point, resulting in a flat-topped peak for reasons described above with the wave-pinning

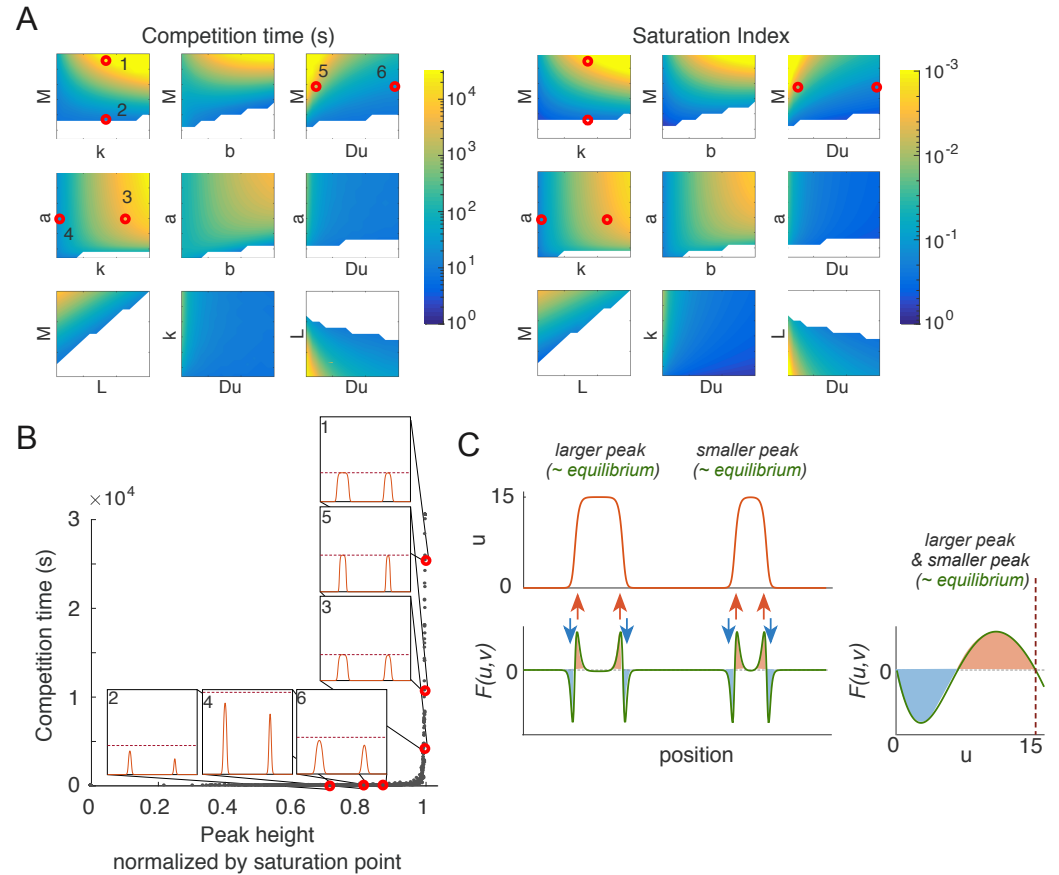

**Figure 4. Saturation is a major contributor to differences in competition times.**

A) Competition time and saturation are tightly correlated. Competition time (s) is shown in color (note log scale). Saturation index is defined here as  $(u_{\text{sat}} - u_{\text{max}})/u_{\text{sat}}$ , and colored in inverse log scale (smaller saturation index indicates peaks are closer to saturation). Basal parameters:  $a = 1 \mu\text{m}^2\text{s}^{-1}$ ,  $b = 1 \text{s}^{-1}$ ,  $k = 0.01 \mu\text{m}^2$  and  $D_u = 0.01 \mu\text{m}^2\text{s}^{-1}$ ,  $D_v = \infty$ ,  $M = 40$ ,  $L = 20 \mu\text{m}$ . Each color plot represents a 15-fold parameter variation from 0.2x  $\sim$  3x of the basal parameter value. White regions indicate parts of parameter space where polarized states collapse to homogeneous states. Numbered red dots correspond to the simulations illustrated in the inset of panel B). B) Each of the simulations performed for panel A) is plotted as one dot. Competition time (Y axis) is plotted against peak height  $u_{\text{max}}$  normalized to the saturation point  $u_{\text{sat}}$  for that simulation (X axis). Inset graphs indicate starting conditions for the selected simulations with parameters indicated by red dots in A). C) When two mesas coexist, they share the same  $F(u, v)$  curve and almost the same  $u_{\text{max}}$ . Thus, the wider peak has a negligible recruitment advantage over the narrower one.

**Figure 4-Figure supplement 1.** Peak width,  $\ell_{\text{mesa}}$ , is a robust indicator of saturation over a broad range of system parameters. Data points collected from simulations in **Figure 4A**.

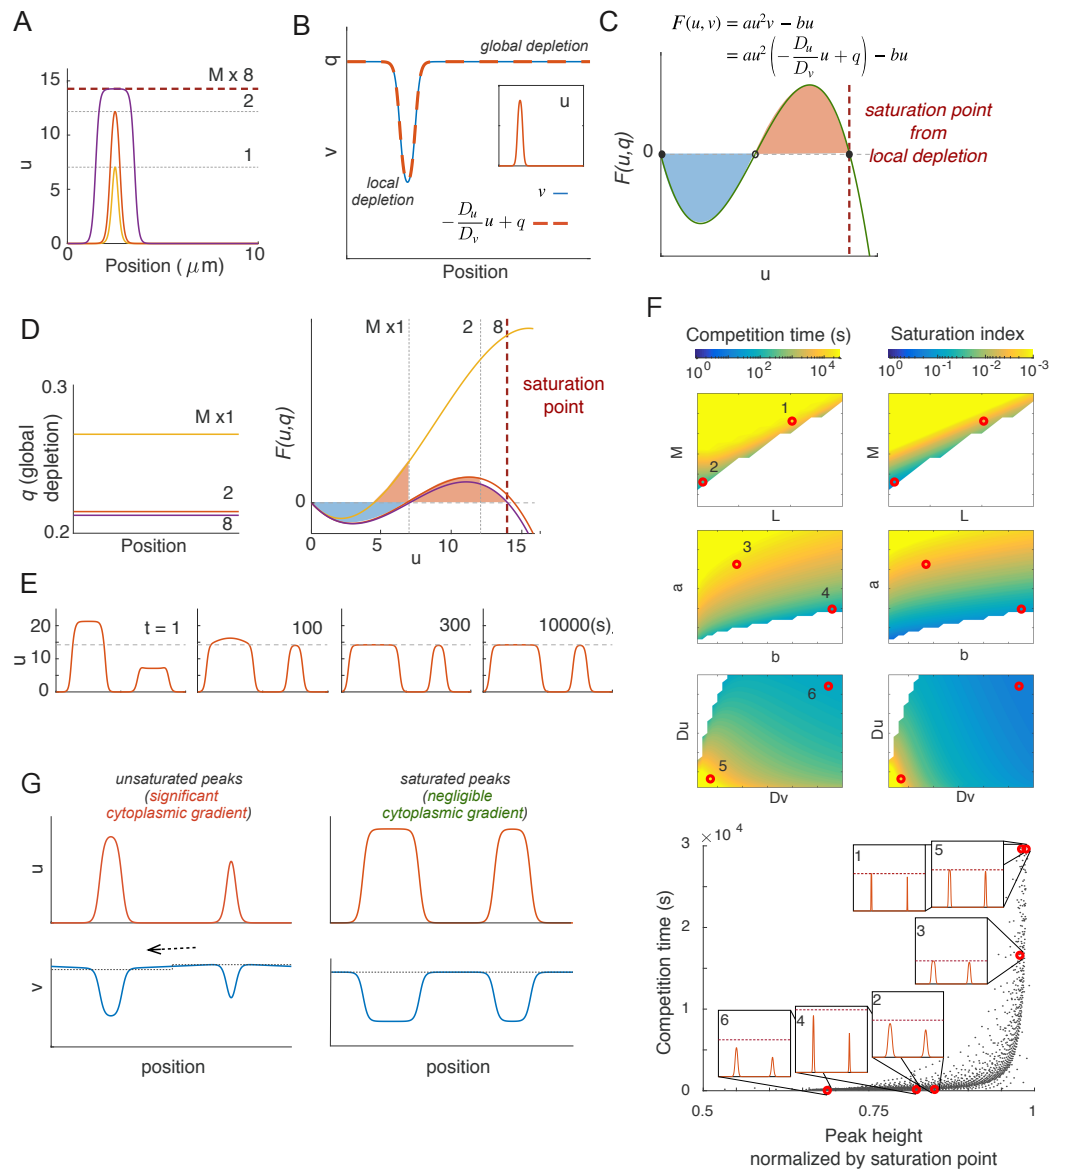

**Figure 5. Local substrate depletion leads to saturation and slow competition.**

A) Turing-type model with  $D_v < \infty$  displays a transition between sharp peaks and flat-topped mesas with increased  $M$ . B) Local depletion of  $v$  in the cytoplasm beneath the peak results in a linear relationship between the concentration profile of  $v$  and  $u$ . Inset indicates  $u$  profile. C) The effect of local depletion transforms the reaction term of the Turing-type model from a quadratic  $F(u, v)$  to a cubic  $F(u, q)$ , yielding a third fixed point. D) The cubic reaction term  $F(u, q)$  results in a behavior similar to that of the wave-pinning model: When  $M$  is low,  $q$  is high, and the peak is sharp; when  $M$  increases, depletion of cytoplasmic substrate makes  $F(u, q)$  drop, and  $u_{\max}$  eventually approaches a saturation point. E) Peaks saturated by local depletion are meta-stable. F) Saturation index correlates with competition timescale. Simulations and display as in **Figure 4A,B**. Parameter variations in  $a$  vs  $b$  and  $D_u$  vs  $D_v$  consist of  $30 \times 30$  simulations each of  $0.1 \times \sim 3 \times$  the basal parameter values. Parameter variations in  $M$  vs  $L$  consists of  $15 \times 15$  simulations of  $0.2 \sim 3 \times$  basal parameter values. Basal parameters are as in **Figure 4A**, except that  $D_v = 1 \mu\text{m}^2 \text{s}^{-1}$ . Graph shows all simulations plotted as in **Figure 4B**, with illustrative simulations corresponding to numbered red dots. G) When  $D_v$ , the basal cytoplasmic substrate concentration underneath each peak (shown in dashed lines) quickly reaches a quasi-steady state with the peak. The stronger the recruitment power of the peak, the lower the basal cytoplasmic substrate level. This creates a cytoplasmic gradient when two peaks have different recruitment power, resulting in a cytoplasmic flux towards the larger peak. The gradient becomes negligible when both peaks are saturated, resulting in meta-stable peaks.

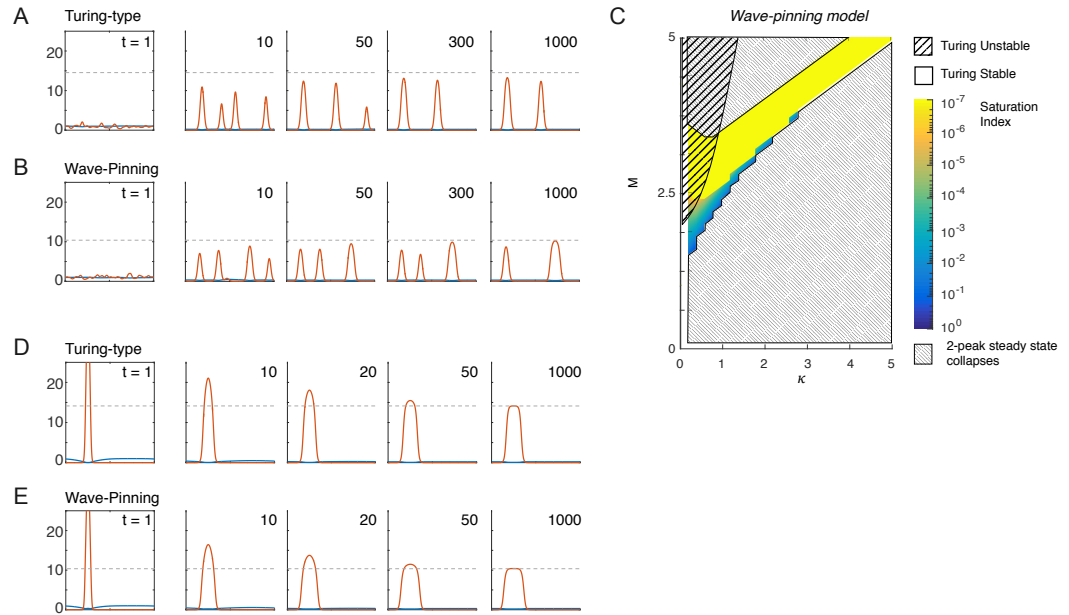

**Figure 6. Turing instability and wave-pinning behavior in both the Turing-type and the Wave-Pinning models.**

A, B) Simulations of Turing-type (*Equation 4*) and Wave-Pinning model (*Equation 5*).  $u$  is indicated in red,  $v$  in blue. Dashed line indicates the saturation point.  $M = 2$ ,  $D_u = 0.01 \mu\text{m}^2\text{s}^{-1}$ ,  $D_v = 1 \mu\text{m}^2\text{s}^{-1}$  for both models;  $k = 0 \mu\text{m}^2$  for the Turing-type model and  $k = 0.01 \mu\text{m}^2$  for the Wave-Pinning model. C) Behaviors of the Wave-Pinning model. Stability of the homogeneous steady state was calculated as in methods section. Saturation index was extracted from simulated 2-peak steady states, plotted in color in log scale. Uncolored regions indicate parameter spaces where the 2-peak steady state collapses to the homogeneous steady state. D,E) Both the Turing and the Wave-Pinning model can manifest wave-pinning behavior. Initial conditions for both simulations are  $u = 0$ ,  $v = M$ , with a spike in  $u$  that triggers the wave.  $u$  is indicated in red,  $v$  in blue. Parameter values are the same as in A and B, except that  $M = 2.6$ .

318 model (*Figure 5D*). In this case, it is possible to derive a simple expression for the saturation point:

$$u_{\text{sat}} = \sqrt{\frac{2bD_v}{aD_u}} \quad (12)$$

319 As with saturation due to the wave-pinning reaction term, saturation by local depletion also slowed  
 320 competition dramatically, leading to meta-stable peaks (*Figure 5E*). Exploration of a wide parameter  
 321 range indicated that as with saturation via the reaction term, saturation due to local depletion of  
 322 substrate is also a dominant contributor to the timescale of competition (*Figure 5F*).

323 When  $D_v < \infty$ , two unequal peaks no longer “see” the same level of substrate,  $v$ . Instead, the  
 324 local  $v$  rapidly reaches a quasi steady-state with each peak (*Figure 5G*). When two unsaturated  
 325 peaks coexist, the higher peak has a stronger recruitment power for reasons discussed in *Figure 2F*.  
 326 This drives a greater depletion and hence lower baseline of  $v$  under the higher peak, generating a  
 327 cytoplasmic  $v$  gradient that drives a flow of GTPase towards the higher peak, and hence competition  
 328 (*Figure 5G*). In contrast, when two unequal but saturated peaks coexist, they have similar recruit-  
 329 ment power, so there is a negligible cytoplasmic gradient, and competition occurs on a dramatically  
 330 slower timescale.

### 331 Unifying Turing and Wave-pinning models

332 As the Turing-type and Wave-pinning models behaved similarly with regard to to competition  
 333 and saturation, we revisited their behavior with regard to diffusion-driven instability and wave-like

334 spread. We first explored the behavior of simulations of the Wave-pinning (*Equation 5*) and Turing-  
335 type (*Equation 4*) models starting from the homogeneous steady state with random noise for  $u$ .  
336 In both cases, multiple peaks formed and then rapidly competed. As the winning peaks grew to  
337 approach the saturation point, competition slowed dramatically (*Figure 6A*). Linear stability analysis  
338 of the wave-pinning model (see Methods section) confirmed that there is a parameter regime in  
339 which this model is Turing unstable (*Figure 6C*).

340 Wave-pinning dynamics are thought to depend on a bi-stable system (*Mori et al., 2008, 2011*).  
341 As we showed that Turing-type models can exhibit bi-stability due to local depletion of cytoplasmic  
342 substrate, they too should be able to manifest wave-pinning dynamics. Indeed, if we start a  
343 simulation with one large spike of  $u$  and all other material as  $v$ , the spike triggers positive feedback  
344 and expands in a wave-like manner. As the wave spreads,  $v$  is depleted, until eventually the  
345 wave-pinning condition *Equation 8* is satisfied, and the wave stops when the top of the peak  
346 corresponds to the saturation point  $u_{\text{sat}}$  of each model. This behavior is seen in both Turing-type  
347 and Wave-pinning models without discernible qualitative differences.

348 In summary, MCAS models may exhibit Turing instability or Wave-pinning dynamics, and may  
349 compete effectively or co-exist, depending on parameters. The "typical" behaviors of Turing and  
350 Wave-pinning models simply represent behaviors of MCAS models in specific parameter subspaces.  
351 This view is consistent with a recent review (*Goryachev and Leda, 2017*).

### 352 Effect of increasing distance between peaks

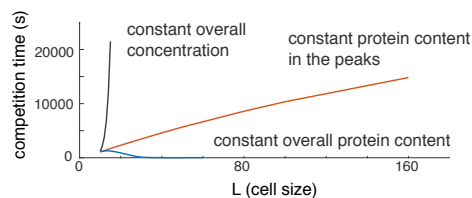

362 **Figure 7. Effect of domain size on competition time.**

363 Effect of expanding the domain size on  
364 competition time. Gray: overall concentration was  
365 set to constant as  $L$  increases (proportional  
366 increase of total protein content in the system  $M$ ;  
367 peaks saturate). Blue: overall protein content  
368 constant (peaks shrink to feed the larger  
369 cytoplasm). Red: protein content in the peaks is  
370 maintained constant (identical peak shape).

371  
372  
373  $L$  while adding the exact amount of GTPase required to fill the cytoplasm in the extended domain  
374 so that the amount of GTPase *in the peaks* remained constant. This scenario allowed us to quantify  
375 the effect of increasing distance between peaks without confounding changes in peak size. The  
376 result was that competition became slower in a sub-linear manner with distance (*Figure 7*, red line).  
377 Thus, distance between peaks can slow competition, but does so in a much more gradual manner  
378 than the approach to saturation.  
379

### 380 Other MCAS models also link competition timescale to saturation

381 Our analysis has focused on specific illustrative models, but many other forms of  $F(u, v)$  in  
382 *Equation 2* can also support polarization. For example, positive feedback strength may vary,

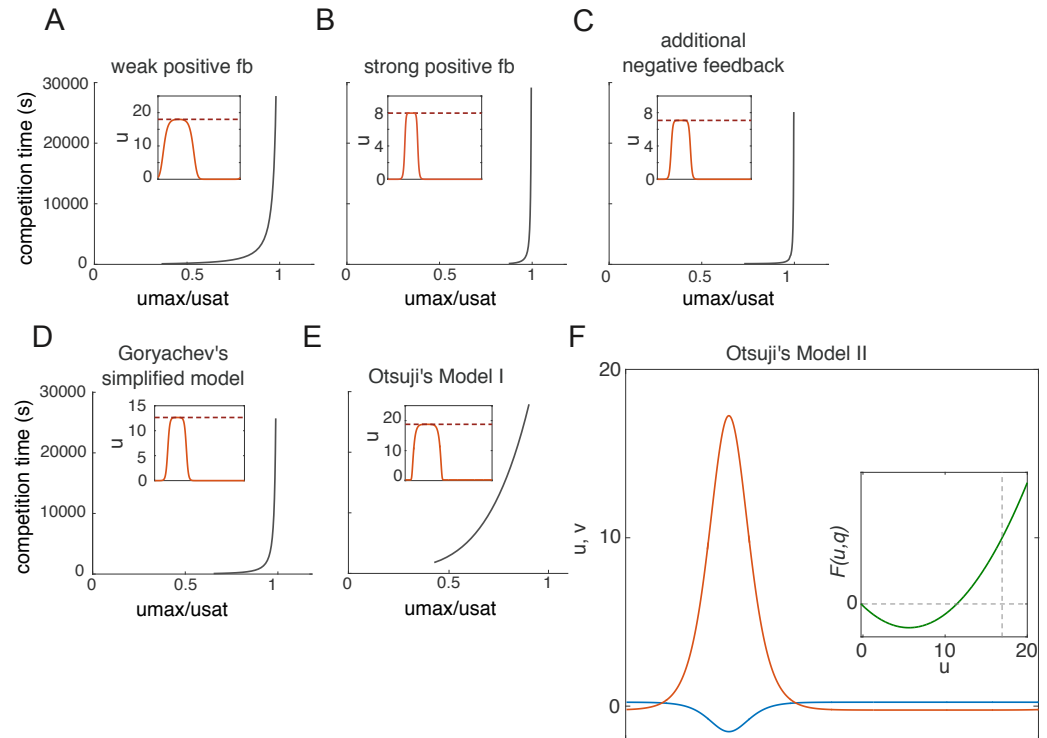

**Figure 8. Other MCAS models also link competition timescale to saturation.**

Competition time as a function of saturation for other MCAS models. Insets: peak shape upon reaching saturation. Red dashed lines indicate saturation point. A) weak positive feedback,  $F(u, v) = u^{1.2}v - u$ ; B) strong positive feedback,  $F(u, v) = u^3v - u$ ; C) additional negative feedback  $F(u, v) = (u^2 - 0.01u^4)v - u$ ; D) Goryachev's simplified model  $F(u, v) = (u^2 + u)v - u$  (Goryachev and Pokhilko, 2008); E) Otsuji's model 1  $F(u, v) = a_1v - a_1(u + v)/[a_2(u + v) + 1]^2$  with the original parameters described in (Otsuji et al., 2007). In each instance, competition time slows down dramatically as peaks saturate. F) In Otsuji's model 2 with the original parameters,  $F(u, v) = a_1(u + v)[(D_u/D_v u + v)(u + v) - a_2]$  (Otsuji et al., 2007), saturation is avoided by allowing negative values of  $u$  or  $v$ .

383 yielding different exponents for the activation term (e.g.  $f(u) = u^{1.2}$  with weak feedback, or  $f(u) = u^3$   
 384 with strong feedback). Or, positive feedback may operate by reducing inactivation rather than by  
 385 increasing activation (e.g.  $f(u) = 1, g(u) = u/(1 + u^2)$ ). Or, positive feedback may be accompanied  
 386 by negative feedback, as proposed for the yeast polarity circuit (Howell et al., 2012; Kuo et al.,  
 387 2014) (e.g.  $f(u) = u^2 - cu^4$ ). As local cytoplasmic depletion is a universal mechanism of saturation,  
 388 we would expect that competition time slows down as the system approaches saturation in all of  
 389 these models. Indeed, all of these variations displayed a saturation point, leading to a transition  
 390 from sharp peaks to mesas as  $M$  was increased. And in each case, the change in peak shape was  
 391 accompanied by a dramatic slowing of competition (Figure 8A-E). This suggests that our findings  
 392 are broadly applicable to MCAS models.

393 The only counterexample we have encountered so far is model II from Otsuji et al. (2007), where  
 394

$$F(u, v) = a_1(u + v) \left[ \left( \frac{D_u}{D_v} u + v \right) (u + v) - a_2 \right] \quad (13)$$

395 Unlike other reaction terms based on mass action kinetics (Equation 2), this reaction term is not  
 396 dependent on  $v$ , but rather on the combined concentration of  $u$  and  $v$ . Thus, activation in this model  
 397 is no longer restricted by  $v$  depletion as in the other models mentioned above, and  $v$  can assume  
 398 negative values when  $u$  is high, avoiding saturation (Figure 8F). This eliminates the effect of local

399 depletion: When  $v$  is substituted with  $-\frac{D_u}{D_v}u + q$ ,  $F(u, q)$  is a curve lacking a third fixed point (and  
400 hence lacking saturation). However, as concentrations of  $u$  or  $v$  cannot be negative in cells, this  
401 model is not physiologically relevant.

## 402 Discussion

### 403 Competition between peaks obeys a “saturation rule”

404 Early studies on MCAS systems emphasized that different models can display different behaviors,  
405 including Turing instability and wave-pinning dynamics. In the parameter regimes examined,  
406 Turing-type model peaks displayed rapid competition, while wave-pinning model peaks co-existed,  
407 suggesting that competition might be linked to model architecture. However, our findings do not  
408 support a categorical distinction between model types. Indeed, a classical wave-pinning model can  
409 exhibit Turing instability depending on parameters, and a classical Turing-type model can exhibit  
410 wave-pinning behavior when the total GTPase amount is increased (**Figure 6**) (*Goryachev and Leda,*  
411 **2017**).

412 Instead of categorizing MCAS models into different types, our findings lead us to propose that  
413 the dynamics of competition between peaks obey a “saturation rule”. We suggest that competition  
414 between activator peaks for the shared pool of cytoplasmic substrate (scenario 1 in **Figure 2A**)  
415 is universal for all biologically relevant MCAS models. However, each model encodes a calcula-  
416 ble, parameter-dependent saturation point, such that the peak activator concentration cannot  
417 exceed that level at a polarized steady state. As the peak activator concentration approaches  
418 the saturation point, the difference between unequal peaks in terms of their ability to recruit  
419 cytoplasmic substrates becomes negligible, leading to dramatically slower competition and effective  
420 co-existence between peaks (scenario 3 in **Figure 2A**). Varying parameters affects competition time  
421 predominantly by affecting the degree to which competing peaks approach the saturation point.

### 422 Biological implications of the saturation rule

423 The models considered in this report represent a drastically simplified system compared to any  
424 biological system. Three simplifying assumptions are particularly noteworthy. First, we considered  
425 only a single spatial dimension, whereas cell membranes are two-dimensional and the cytoplasm  
426 is three-dimensional. Higher dimensions introduce additional factors such as curvature (*Mori*  
427 *et al., 2011; Ramirez et al., 2015*) that may also affect competition. Second, because polarization  
428 phenomena often employ stable proteins and occur on rapid timescales compared to cell growth,  
429 MCAS models assume a constant domain size and constant protein amount. This may not always  
430 apply. Third, we modeled two-component systems, whereas all known polarity systems have  
431 multiple components. More realistic multi-component models of the budding yeast polarity circuit  
432 exist (*Goryachev and Pokhilko, 2008; Howell et al., 2009; Kuo et al., 2014; Wu et al., 2015*) and  
433 preliminary simulations indicate that they too behave according to the saturation rule. However,  
434 adding additional components can yield emergent behaviors not seen in the two-component  
435 systems (*Marcon et al., 2016; Otsuji et al., 2010*). Thus, predictions of the saturation rule will need  
436 to be tested experimentally to assess whether the insights derived from simple MCAS models are  
437 translatable to biological systems.

438 The most obvious prediction stemming from the saturation rule is that systems should transition  
439 between uni- and multi-polarity regimes as total GTPase contents change: lower levels should  
440 yield uni-polarity, while higher levels sufficient to allow activator concentrations to approach the  
441 saturation point should yield multi-polarity.

442 In the tractable budding yeast *Saccharomyces cerevisiae*, the master polarity regulatory GTPase,  
443 Cdc42, becomes concentrated at polarity sites. Initial peaks of Cdc42 appear to compete on a 1  
444 minute timescale to leave only one winning peak. Moderate overexpression of Cdc42 did not change  
445 this behavior (*Howell et al., 2012*). Simultaneous overexpression of Cdc42 and its GEF blocked  
446 polarization (*Ziman and Johnson, 1994*), presumably because active GTPase spread throughout the



447 cell cortex. This phenomenon has been explored in Turing models: when component concentrations  
448 are too high, the system no longer polarizes, but instead evolves to a stable steady state with high  
449 levels of activator uniformly distributed all over the surface (*Howell et al., 2012*).

450 One way to avoid uniform activation is to increase cell volume as well as total protein content in  
451 parallel, maintaining overall concentrations unchanged, which is analogous to the gray line in  
452 **Figure 6**. Yeast cells occur naturally as haploids and diploids, and cells with higher ploidy can be  
453 constructed. It is also possible to block cytokinesis, generating larger cells due to failed cell division.  
454 It appears that cell volume and total protein amount scale with ploidy for most proteins, so that total  
455 protein concentrations remain generally unchanged. If we were to keep the activator and substrate  
456 concentrations at the homogeneous steady state of an MCAS model constant, then a model with  
457 a larger domain size would provide a larger pool of substrate, allowing greater local enrichment  
458 of the activator, so that peak activator concentrations would approach the saturation point. This  
459 predicts that as cells become larger they should eventually switch from uni- to multi-polarity.

460 For some filamentous fungi, like *Ashbya gossypii*, development proceeds through a cell enlarge-  
461 ment process in which a single shared cytoplasm houses more and more nuclei. This provides a  
462 natural system that samples a large range of cell sizes. Cell polarity in *A. gossypii* is thought to be  
463 governed by the same Cdc42-centered circuit employed in *S. cerevisiae*, but these cells transition  
464 from always having a single polarity site when they are small (following germination), to having  
465 two (and then more) polarity sites as they grow larger, leading to hyphal branching (*Knechtle et al.,*  
466 **2003**). Sporadic septation (division separating parts of a single large cell into two smaller ones)  
467 can restore a single polarity site to the cell, but continued growth then leads to additional polarity  
468 site(s) again. This behavior is consistent with a switch from uni- to multi-polarity according to the  
469 saturation rule. A prediction for this system would be that reducing total content of polarity proteins  
470 should delay the switch from uni-polar to multi-polar behavior, so that it would take a larger cell to  
471 initiate a hyphal branch.

## 472 **Conclusions**

473 We have examined the behavior of a family of simplified mathematical models that capture key  
474 aspects of the behavior of the Rho-GTPases that regulate the formation of cortical domains in cells.  
475 Our analysis suggests that all biologically relevant models of this type (and there are several varieties)  
476 display reproducible transitions in system behavior as parameters vary. In particular, each model  
477 has a saturation point that depends on model parameters. With low amounts of GTPase, the system  
478 forms sharp peaks of active GTPase, but as GTPase levels increase, the peak GTPase concentration  
479 approaches the saturation point and the concentration profiles broaden into flat-topped mesas. If  
480 there are two or more peaks of GTPase, the peaks will compete with each other until one emerges  
481 as the single stable winner. However, the time scale of competition slows dramatically as the peaks  
482 broaden, so in practice the systems transition from a situation with rapid cut-throat competition to  
483 one in which competition is so languid that peaks co-exist on biologically relevant timescales. Local  
484 depletion of the cytoplasmic substrate provides a mechanism of saturation that is universal to all  
485 activator-substrate systems, so regardless of the specific biochemical feedback mechanism, a cell  
486 that polarizes through local activation and substrate depletion should be able to switch between uni-  
487 or multi-polar outcomes by regulating system parameters. The discovery of this intrinsic property  
488 of the Rho-GTPase system suggests hypotheses testable in the context of various different cell  
489 types.

## 490 **Methods**

### 491 **Model simulation**

492 Simulations of the MCAS models were done on MATLAB with parameters described in the  
493 main text. All models were simulated on 1-dimensional domains with fixed spatial resolution of  
494 500 grid points, except the simulations with long  $L$ , where number of grid points was increased

495 proportionately. The linear diffusion term was implemented by the implicit finite difference method,  
 496 and the non-linear reaction term by the explicit Euler method every time step. For simulations in the  
 497 limit  $D_v \rightarrow \infty$ , the mean of  $v$  was taken every time step. Simulations proceeded with adaptive time  
 498 stepping according to relative error in the reaction term. The MATLAB code used for simulations is  
 499 provided in Source Code Files.

### 500 Calculation of competition time

501 Simulations of competition is generally generated as follows: Two-peak steady states were  
 502 first generated by simulating the evolution of the homogeneous steady state with an added sine  
 503 wave. Perturbations were then introduced by increasing the amplitude of the concentration profiles  
 504  $u(x) v(x)$  at regions that we call the first peak by a given percentage (e.g. a 20% increase), and  
 505 decreasing the amplitude of the second peak by the same percentage (e.g. a 20% decrease). The  
 506 resulting two unequal peaks were then allowed to compete.

507 For simulations used in **Figure 4A** and **Figure 5F**, we recorded the measurements of the peak  
 508 height ( $u_{\max}$ ) to calculate the saturation index, and the competition time. The steady state  $u_{\max}$  was  
 509 obtained from the two-peak steady state. The two peaks were then perturbed by increasing the  
 510 protein content of the left half-domain and decreasing the protein content of the right half-domain,  
 511 so that each half has 60% and 40% of the original  $M$ , respectively. For more accurate measurements  
 512 of the competition time, the two halves were first simulated individually to their own steady states  
 513 in isolation. Upon the start of competition, the two half-domain were allowed to communicate  
 514 through diffusion, and the competition time was calculated by measuring the resolution time of  
 515 two unequal peaks from 60% and 40% at the beginning to 99% and 1%.

### 516 Non-dimensionalization of MCAS Models

517 We consider the mass-conserved activator-substrate (MCAS) model in a one-dimensional domain  
 518 with periodic boundary conditions,

$$\frac{\partial u}{\partial t} = D_u \frac{\partial^2 u}{\partial x^2} + F(u, v) \quad (14a)$$

$$\frac{\partial v}{\partial t} = D_v \frac{\partial^2 v}{\partial x^2} - F(u, v) \quad (14b)$$

519 where the diffusion of  $v$  is much faster than  $u$ , as set by  $D_v \gg D_u$ .

520 This model is a mass-conserved version of an activator-substrate model, where  $u$  is the activator  
 521 and  $v$  is the substrate. As the activator concentration  $u$  increases at certain locations, the substrate  
 522  $v$  is depleted at the same rate, therefore, the mass  $M$  is a constant conserved for all time,

$$M = \int_0^L (u + v) dx. \quad (15)$$

523 The reaction terms of these models, given by  $F(u, v)$ , generally contain a  $v$ -dependent activation  
 524 term with nonlinear positive-feedback, and a  $v$ -independent inactivation term.

$$F(u, v) = f(u)v - g(u) \quad (16)$$

525 For example, the model proposed by **Mori et al. (2008)**. has an  $f(u)$  with a saturable non-linear  
 526 term and a linear  $g(u)$ ,

$$F(u, v) = \left( k_0 + \frac{au^2}{K^2 + u^2} \right) v - bu \quad (17)$$

We assume negligible  $k_0$ , and rewrite this system with dimensionless variables  $\tilde{u}$ ,  $\tilde{v}$ ,  $\tilde{x}$ ,  $\tilde{t}$ , by scaling  
 the length by the domain size  $L$ , and time by  $T$  and  $u$  and  $v$  by  $U$ ,

$$\tilde{x} = \frac{x}{L}, \quad \tilde{t} = \frac{t}{T}, \quad \tilde{u} = \frac{u}{U}, \quad \tilde{v} = \frac{v}{U}$$

527 yielding

$$\frac{\partial \tilde{u}}{\partial \tilde{t}} = \frac{D_u T}{L^2} \frac{\partial^2 \tilde{u}}{\partial x^2} + \tilde{F}(\tilde{u}, \tilde{v}) \quad (18a)$$

$$\frac{\partial \tilde{v}}{\partial \tilde{t}} = \frac{D_v T}{L^2} \frac{\partial^2 \tilde{v}}{\partial x^2} - \tilde{F}(\tilde{u}, \tilde{v}) \quad (18b)$$

where the nondimensionalized reaction terms are now

$$\tilde{F}(\tilde{u}, \tilde{v}) = \frac{T}{U} \left( a \frac{U^2 \tilde{u}^2}{K^2 + U^2 \tilde{u}^2} U \tilde{v} - b U \tilde{u} \right)$$

and the non-dimensional mass  $\tilde{M}$  is

$$\tilde{M} = \frac{M}{U} = \int_0^1 (\tilde{u} + \tilde{v}) d\tilde{x}$$

Setting the timescale and concentration scale as

$$T = \frac{1}{b}, \quad U = K \sqrt{\frac{b}{a}}$$

528 and dropping the tildes, puts the system into the form

$$\frac{\partial u}{\partial t} = \delta \frac{\partial^2 u}{\partial x^2} + F(u, v) \quad (19a)$$

$$\frac{\partial v}{\partial t} = r \delta \frac{\partial^2 v}{\partial x^2} - F(u, v) \quad (19b)$$

529 where

$$F(u, v) = \frac{u^2}{1 + \kappa u^2} v - u \quad (20)$$

and the dimensionless parameters are

$$\delta = \frac{D_u}{bL^2}, \quad r = \frac{D_v}{D_u}, \quad \kappa = \frac{U}{K} = \frac{b}{a}.$$

530 Setting  $\kappa$  to zero, we obtain a "Turing-type" system with

$$F(u, v) = u^2 v - u. \quad (21)$$

### 531 **Steady state solutions for the $D_v \gg D_u$ limit**

532 We first consider the simplified case where  $r \rightarrow \infty$ . The solutions  $u, v$  are expanded as regular  
533 perturbation series with respect to inverse powers of  $r$ ,

$$v = v_0 + \frac{1}{r} v_1 + O(r^{-2}) \quad u = u_0 + \frac{1}{r} u_1 + O(r^{-2}), \quad (22)$$

534 and substituted into (19ab). The leading order equation for  $u_0$  at  $O(1)$  mirrors (19a),

$$\frac{\partial u_0}{\partial t} = \delta \frac{\partial^2 u_0}{\partial x^2} + F(u_0, v_0), \quad (23a)$$

535 while at  $O(r)$ , the leading order equation for  $v_0$  becomes  $v_{0,xx} = 0$ . Subject to the periodic boundary  
536 conditions, this forces  $v_0$  to be spatially uniform, but it can depend on time,  $v_0 = v_0(t)$ . In order to  
537 obtain an equation defining the evolution of  $v_0$  we proceed to the next term in the expansion. At  
538  $O(1)$  we find that in order for a solution for  $v_1$  to exist, the inhomogeneous terms in the equation  
539 must satisfy a solvability condition. Set by the Fredholm alternative theorem, this condition gives  
540 the evolution for  $v_0(t)$  in terms of the reaction rate averaged over the domain,

$$\frac{dv_0}{dt} = - \int_0^1 F(u_0, v_0) dx. \quad (23b)$$

541 This equation effectively describes the evolution of the average substrate concentration in the  
542 well-mixed limit. Moving forward, we will drop the zero-subscripts and focus on solving this leading  
543 order system.

544 At steady state, the solution  $(u_{ss}(x), v_{ss})$  satisfies the system of equations

$$0 = \delta \frac{d^2 u_{ss}}{dx^2} + F(u_{ss}, v_{ss}) \quad (24a)$$

$$0 = - \int_0^1 F(u_{ss}, v_{ss}) dx \quad (24b)$$

and the constraint on the total mass

$$M = v_{ss} + \int_0^1 u_{ss} dx.$$

To understand the properties of the solutions it is helpful to integrate (24a) with respect to  $du$  to obtain

$$\begin{aligned} H &= \int \delta \frac{d^2 u_{ss}}{dx^2} du + \int F(u_{ss}, v_{ss}) du \\ &= \int \delta \frac{d^2 u_{ss}}{dx^2} \frac{du}{dx} dx + \int F(u_{ss}, v_{ss}) du \\ &= \frac{\delta}{2} \left( \frac{du_{ss}}{dx} \right)^2 + \int F(u_{ss}, v_{ss}) du \\ &= E_k + \Phi(u_{ss}, v_{ss}) \end{aligned} \quad (25)$$

where  $H$  is a constant and

$$E_k = \frac{\delta}{2} \left( \frac{du_{ss}}{dx} \right)^2 \quad \Phi(u_{ss}, v_{ss}) = \int F(u_{ss}, v_{ss}) du.$$

545 Solutions  $u_{ss}(x)$  can be found that have any number of peaks,  $n$ , with corresponding spatial period  
546  $P = \frac{1}{n}$ . These steady states are spatially periodic multi-peak solutions, with all peaks being all  
547 identical and are equally spaced within each solution (**Figure 9**-Figure supplement 1).

548 The local extrema,  $u_{\min}$  and  $u_{\max}$ , occur where  $du_{ss}/dx = 0$ . A direct consequence of this is that for  
549 a given value of  $H$ , the integral of  $F(u, v)$  from  $u_{\min}$  to  $u_{\max}$  must be zero to satisfy (25). This condition  
550 has been referred to as the **wave-pinning condition** (Mori et al., 2008), and is general to all MCAS  
551 models,

$$\Phi(u_{\min}, v) - \Phi(u_{\max}, v) = 0. \quad (26)$$

552 There also exists a special value of the cytoplasmic concentration  $v$ , which we call  $v_{\text{sat}}$  at which

$$F(u_{\min}, v_{\text{sat}}) = F(u_{\max}, v_{\text{sat}}) = 0 \quad (27)$$

553 We refer to this condition as the **saturation condition**, which is crucial for later discussion of  
554 competition time scale. At saturation,  $u_{\min} = 0$  and we label the value of  $u_{\max}$  as  $u_{\text{sat}}$ , which is the  
555 largest value of  $u_{\max}$  possible.

### 556 Stability Analysis of Multipeak Steady States

557 The key question of whether competition happens between two peaks can be answered math-  
558 ematically by assessing the stability of the two-peak steady state solution  $(u_{ss}(x), v_{ss})$ . Consider  
559 the multi-peak steady state when peak number  $n = 2$ , a steady state solution  $(u_{ss}(x), v_{ss})$  has two  
560 identical peaks centered at  $x = \frac{1}{4}, x = \frac{3}{4}$ . Each peak is reflectionally symmetric about its maximum  
561 and the overall solution is also symmetric about  $x = \frac{1}{2}$  (see **Figure 9**-Figure supplement 2.).

The stability of the two-peak solution is studied by assuming small perturbations of the form

$$u(x, t) = u_{ss}(x) + \epsilon U(x)e^{\lambda t} \quad v(t) = v_{ss} + \epsilon V e^{\lambda t}$$

562 where  $\lambda$  and  $(U(x), V)$  satisfy the linearized eigenvalue problem

$$\delta \frac{d^2 U}{dx^2} + \partial_u F(u_{ss}(x), v_{ss}) U(x) + V \partial_v F(u_{ss}(x), v_{ss}) = \lambda U(x) \quad (28a)$$

$$- \int_0^1 \partial_u F(u_{ss}(x), v_{ss}) U(x) dx - V \int_0^1 \partial_v F(u_{ss}(x), v_{ss}) dx = \lambda V. \quad (28b)$$

563 The solution  $(u_{ss}(x), v_{ss})$  is unstable if there exists at least one eigenvalue with  $\text{Re}(\lambda) > 0$ .

564 To approach this question it is sufficient to restrict attention to a particular form of eigenmode,  
 565 one with  $U(x)$  being antisymmetric with respect to  $x = \frac{1}{2}$ , namely  $U(x + 1/2) = -U(x)$ . Since  $u_{ss}(x)$  is  
 566 symmetric with respect to  $x = \frac{1}{2}$ , the integrand of the first integral in (28b) is antisymmetric and  
 567 hence the integral on the whole domain must vanish. Consequently, for this type of eigenmode,  
 568  $V = 0$  solves (28b) and the system reduces to

$$\delta \frac{d^2 U}{dx^2} + C(x)U(x) = \lambda U(x) \quad \text{where} \quad C(x) = \left. \frac{\partial F}{\partial u} \right|_{u_{ss}(x), v_{ss}}. \quad (29)$$

569 To solve (29) on the full domain  $x \in [0, 1]$  with periodic boundary conditions, it is sufficient to  
 570 solve the equation on a quarter domain,  $x \in [0, \frac{1}{4}]$ , with boundary conditions

$$U_1(0) = 0, \quad U_1'(\frac{1}{4}) = 0 \quad (30)$$

571 or

$$U_2'(0) = 0, \quad U_2(\frac{1}{4}) = 0. \quad (31)$$

572 The periodic function  $U(x)$  is then constructed by extending  $U_1(x)$  symmetrically with respect to  
 573  $x = \frac{1}{4}$ ,  $U_1(\frac{1}{2} - x) = U_1(x)$  (**Figure 9**-Figure supplement 3A), or by similarly extending  $U_2(x)$  anti-  
 574 symmetrically,  $U_2(\frac{1}{2} - x) = -U_2(x)$  (**Figure 9**-Figure supplement 3B).

575 We give a shooting argument to show that there is a positive eigenvalue  $\lambda_1 > 0$  for solutions  
 576 having the form given by (30). Differentiating the steady state equation (24a) with respect to  $x$ , we  
 577 obtain

$$\delta \frac{d^2 u'_{ss}}{dx^2} + \frac{\partial F}{\partial u} u'_{ss} = 0 \quad (32)$$

578 Therefore,  $U(x) = u'_{ss}(x)$  solves (29) with  $\lambda = 0$ . Note that in this case  $u'_{ss}(0) = U(0) = 0$  and  
 579  $u''_{ss}(\frac{1}{4}) = U'(\frac{1}{4}) < 0$  (there is a finite curvature at  $u_{\max}$ ) and hence the second condition in (30) is not  
 580 satisfied. If  $\lambda > \max(C(x))$ , we can re-write (29) as  $\delta U'' = (\lambda - C(x))U$ ,  $U > 0$  and  $U(x)$  will be monotonely  
 581 growing and  $U'(\frac{1}{4}) > 0$ . Since we have constructed solutions achieving positive and negative values  
 582 for  $U'(\frac{1}{4})$ , by continuity, there exists an eigenvalue in the range  $0 < \lambda_1 < \max(C(x))$  that will yield  
 583 an eigenmode satisfying (30) (**Figure 9**-Figure supplement 4B). Similarly, there exists a second  
 584 eigenmode of the  $U_2(x)$  (31) form with eigenvalue in the range  $0 < \lambda_2 < \max(C(x))$  (**Figure 9**-Figure  
 585 supplement 4B).

586 To summarize, there exist  $\lambda_1, \lambda_2 > 0$ , thus the two-peak steady state is not stable. Further,  
 587 the eigenfunction  $U_1$  corresponds to one peak growing and the other shrinking, i.e. competition  
 588 (**Figure 9A**). The eigenvalue  $\lambda_1$  corresponds to the timescale for competition. On the other hand,  
 589 the eigenfunction  $U_2$  corresponds to neighboring sides of each peak growing while the other sides  
 590 shrink such that peaks merge with each other. The eigenvalue  $\lambda_2$  corresponds to the timescale for  
 591 merging (**Figure 9B**).

## 592 **The eigenvalues for competition and merging**

593 As two-peak steady states are always unstable, the distinction between competition and co-  
 594 existence of two peaks (**Figure 3C-E**) does not reflect a change in stability, but rather, a change in  
 595 the time scale on which competition occurs. As it has been reported that mesas are meta-stable,  
 596 we inquired how the eigenvalues of competition and merging change with increasing width of the  
 597 peaks in a two-peak steady state. We will show that

$$\lambda_{\text{compet}} \approx A_1 e^{-\sqrt{\frac{c}{\delta}} \ell_{\text{mesa}}} \quad \lambda_{\text{merge}} \approx A_2 e^{-\sqrt{\frac{c}{\delta}} \ell_{\text{valley}}} \quad (33)$$

598 where  $\delta$  is the diffusion constant of  $u$ , and  $A_1, A_2, c$  are constants.  $\ell_{\text{mesa}}$  and  $\ell_{\text{valley}}$  are defined as in  
 599 **Figure 9C** with  $\ell_{\text{mesa}} + \ell_{\text{valley}} = \frac{1}{2}$ . Our derivation proceeds in the following steps:

- 600 1. Approximate the steady state as a step function for  $C(x)$  in (29), one segment of which is  
 601 approximated using  $u_{\min}$  for and the other using  $u_{\max}$ . The two segments are connected with a  
 602 mid-point boundary condition at  $x = \ell$  (**Figure 9**-Figure supplement 4).

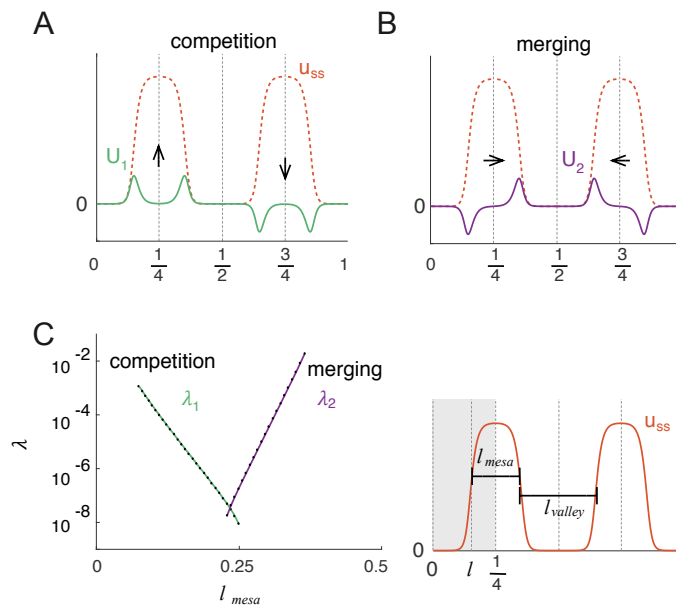

**Figure 9. Linear Stability Analysis reveals two unstable modes: competition and merging.**

The two eigenmodes  $U_1$  and  $U_2$  constructed from the linear stability analysis represents competition (A) and merging (B) of the two peaks in the full domain. C) The eigenvalue for competition  $\lambda_1$  decreases exponentially with increasing peak width  $\ell_{\text{mesa}}$ , and the eigenvalue for merging  $\lambda_2$  increases exponentially with decreasing distance between peaks  $\ell_{\text{valley}}$ . The eigenvalues for competition and merging were calculated by the shooting method for each steady state solution with varying  $M$  from 10 to 32 at an increment of 0.5. The lengths of the valley and the mesa are equivalent to  $2\ell$  and  $\frac{1}{2} - 2\ell$ , with  $\ell$  defined as the position of half max.

**Figure 9-Figure supplement 1.** An MCAS system with a given set of parameters can yield solutions of different periodicities  $n$ .

**Figure 9-Figure supplement 2.** Construction of the two forms of the eigenmode  $U(x)$  using even and odd extensions of the quarter-domain solutions  $U_1(x)$  (A) and  $U_2(x)$  (B) for a two-peak solution  $u_{ss}(x)$ .

**Figure 9-Figure supplement 3.** Schematic representations of the shooting method constructions for the  $\lambda_1$  (shooting from  $x = 0$  to  $x = \frac{1}{4}$ ) (A), and the  $\lambda_2$  (shooting from  $x = \frac{3}{4}$  to  $x = \frac{1}{2}$ ) eigenmodes (B), which represent competition and merging modes respectively.

**Figure 9-Figure supplement 4.** Construction of the approximate  $U_1(x)$  eigenfunction using hyperbolic functions with a midpoint boundary condition (36) at position  $\ell$ .

- 603 2. Calibrate the mid-point boundary condition using the translational eigenmode  $U(x) = u'_{ss}(x)$ ,  $\lambda =$   
 604 0.  
 605 3. Solve the approximated version of (29) for the competition eigenvalue subject to the competi-  
 606 tion boundary condition (30) and the mid-point boundary condition calculated in the previous  
 607 step.  
 608 4. Similarly, solve (29) for the merging eigenvalue subject to the merging boundary condition  
 609 (31).

610 **Approximating the steady state solution**

Without loss of generality, let  $F(u, v)$  be the non-dimensionalized wave-pinning model (20),

$$F(u, v) = f(u)v - u \quad \text{where} \quad f(u) = \frac{u^2}{1 + \kappa u^2}.$$

611 For near-saturation two-peak solutions that have a mesa shape,  $v$  is chosen such that (27) is met,  
 612 thus at  $u = u_{\max}$ ,

$$F(u_{\max}, v) = 0 = f(u_{\max})v - u_{\max} \quad \implies \quad v = \frac{u_{\max}}{f(u_{\max})}. \quad (34)$$

613 We try to approximate the eigenvalue problem (29) on a quarter domain by a step function. The  
 614 two segments  $U(x)$  and  $\tilde{U}(x)$  satisfy (29) with  $u_{ss}(x)$  approximated by  $u(x) = u_{\min}$  and  $u(x) = u_{\max}$   
 615 respectively. The length of  $U$  and  $\tilde{U}$  are the length of the valley  $\ell = \frac{1}{2}\ell_{\text{valley}}$  and the width of the  
 616 mesa  $\tilde{\ell} = \frac{1}{4} - \ell = \frac{1}{2}\ell_{\text{mesa}}$ , respectively. As  $f'(u_{\min}) = 0$ , we can re-write (29) into the step function

$$\begin{cases} \delta U'' = (\lambda + 1)U & 0 \leq x \leq \ell \\ \delta \tilde{U}'' = (\lambda + c)\tilde{U} & \ell \leq x \leq \frac{1}{4} \end{cases} \quad (35)$$

where

$$c = 1 - \frac{u_{\max} f'(u_{\max})}{f(u_{\max})}$$

617 with the **mid-point boundary conditions**

$$U(\ell) = \tilde{U}(\ell) \quad (36a)$$

$$\tilde{U}'(\ell) - \tilde{U}'(\ell) = \Gamma U_*(\ell) \quad (36b)$$

618 **Solving the mid-point boundary condition**

Since  $U = u'_{ss}(x)$  is the translational eigenmode for  $\lambda = 0$ , we first use this solution and (35) to  
 determine  $\Gamma$  in (36b). The piecewise solutions of (35) are given by

$$U(x) = \sinh(\sqrt{\frac{1}{\delta}}x) \quad \tilde{U}(x) = A \sinh(\sqrt{\frac{c}{\delta}}(\frac{1}{4} - x)),$$

619 and then (36) takes the form

$$\begin{aligned} \sinh(\sqrt{\frac{1}{\delta}}\ell) &= A \sinh(\sqrt{\frac{c}{\delta}}\tilde{\ell}) \\ \sqrt{\frac{1}{\delta}} \cosh(\sqrt{\frac{1}{\delta}}\ell) - \sqrt{\frac{c}{\delta}} A \cosh(\sqrt{\frac{c}{\delta}}\tilde{\ell}) &= \Gamma \sinh(\sqrt{\frac{1}{\delta}}\ell) \end{aligned}$$

620 yielding

$$\Gamma = \frac{1}{\sqrt{\delta} \tanh(\sqrt{\frac{1}{\delta}}\ell)} - \frac{\sqrt{c}}{\sqrt{\delta} \tanh(\sqrt{\frac{c}{\delta}}\tilde{\ell})}. \quad (37)$$

621 Approximating the competition eigenvalue

622 To satisfy the **competition boundary condition** (30), the solutions  $U, \tilde{U}$  are chosen in (35) as

$$U = \sinh(\sqrt{\frac{\lambda+1}{\delta}}x) \quad \tilde{U} = A \cosh(\sqrt{\frac{\lambda+c}{\delta}}(\frac{1}{4} - x)). \quad (38)$$

623 Then midpoint boundary condition (36b) can be rewritten with  $\Gamma$  as

$$\begin{aligned} \sinh(\sqrt{\frac{\lambda+1}{\delta}}\ell) &= A \cosh(\sqrt{\frac{\lambda+c}{\delta}}\tilde{\ell}) \\ \sqrt{\frac{\lambda+1}{\delta}} \cosh(\sqrt{\frac{\lambda+1}{\delta}}\ell) - \sqrt{\frac{\lambda+c}{\delta}} A \sinh(\sqrt{\frac{\lambda+c}{\delta}}\tilde{\ell}) &= \Gamma \sinh(\sqrt{\frac{\lambda+1}{\delta}}\ell) \end{aligned}$$

624 This yields the equation

$$\sqrt{\frac{\lambda+1}{\delta}} \frac{1}{\tanh(\sqrt{\frac{\lambda+1}{\delta}}\ell)} - \sqrt{\frac{\lambda+c}{\delta}} \tanh(\sqrt{\frac{\lambda+c}{\delta}}\tilde{\ell}) = \frac{1}{\sqrt{\delta} \tanh(\sqrt{\frac{1}{\delta}}\ell)} - \frac{\sqrt{c}}{\sqrt{\delta} \tanh(\sqrt{\frac{c}{\delta}}\tilde{\ell})}. \quad (39)$$

625 After rearranging terms and making use of simplifications for small  $\delta$ , this equation can be reduced  
626 to

$$\frac{\lambda}{2} - \frac{\lambda}{2\sqrt{c}} + 2\sqrt{c}e^{-2\tilde{\ell}\sqrt{c/\delta}} \approx 0, \quad (40)$$

627 which finally yields

$$\lambda_{\text{compete}} \approx A_1 e^{-\sqrt{\frac{c}{\delta}}\ell_{\text{mesa}}} \quad \text{with} \quad A_1 = \frac{4c}{1 - \sqrt{c}}. \quad (41)$$

628 Approximating the merging eigenvalue

629 Similarly, to satisfy the **merging boundary condition** (31), the solutions  $U, \tilde{U}$  are chosen as

$$U = \cosh(\sqrt{\frac{\lambda+1}{\delta}}x) \quad \tilde{U} = A \sinh(\sqrt{\frac{\lambda+c}{\delta}}(\frac{1}{4} - x)) \quad (42)$$

630 Substituting these solutions into the midpoint boundary conditions (36b) yields

$$\begin{aligned} \cosh(\sqrt{\frac{\lambda+1}{\delta}}\ell) &= A \sinh(\sqrt{\frac{\lambda+c}{\delta}}\tilde{\ell}) \\ \sqrt{\frac{\lambda+1}{\delta}} \sinh(\sqrt{\frac{\lambda+1}{\delta}}\ell) - \sqrt{\frac{\lambda+c}{\delta}} A \cosh(\sqrt{\frac{\lambda+c}{\delta}}\tilde{\ell}) &= \Gamma \cosh(\sqrt{\frac{\lambda+1}{\delta}}\ell) \end{aligned}$$

This system of equations can then be reduced to the condition

$$\sqrt{\frac{\lambda+1}{\delta}} \tanh(\sqrt{\frac{\lambda+1}{\delta}}\ell) - \frac{\sqrt{\lambda+c}}{\sqrt{\delta} \tanh(\sqrt{\frac{\lambda+c}{\delta}}\tilde{\ell})} = \frac{1}{\sqrt{\delta} \tanh(\sqrt{\frac{1}{\delta}}\ell)} - \frac{\sqrt{c}}{\sqrt{\delta} \tanh(\sqrt{\frac{c}{\delta}}\tilde{\ell})}$$

Again, neglecting smaller terms in the limit that  $\delta$  is small, we obtain

$$\frac{\lambda}{2} - 2e^{-2\ell/\sqrt{\delta}} - \frac{\lambda}{2\sqrt{c}} = 0$$

631 which finally yields

$$\lambda_{\text{merge}} \approx A_2 e^{-\sqrt{\frac{1}{\delta}}\ell_{\text{valley}}} \quad \text{with} \quad A_2 = \frac{4\sqrt{c}}{\sqrt{c} - 1}, \quad (43)$$

632 and recall that  $\ell_{\text{valley}} = \frac{1}{2} - \ell_{\text{mesa}}$ . We can numerically calculate two-peak steady-states over a range  
633 of values for  $\ell_{\text{mesa}}$  by varying the total mass  $M$ . The computed results for  $\lambda_{\text{compete}}$  and  $\lambda_{\text{merge}}$  for the  
634 two-peak steady states confirm these analytical predictions (**Figure 9C**).

635 The width of a mesa is an indicator that perfectly correlates with how close to saturation a peak  
636 is. Defining a saturation index as  $(u_{\text{sat}} - u_{\text{max}})/u_{\text{sat}}$ , and  $\ell_{\text{mesa}}$  as normalized by  $\sqrt{b/D_u}$ , we find that two  
637 peak steady states of the dimensional model (**Equation 5**) plotted in **Figure 4** collapse into a perfect  
638 correlation, no matter what parameter we change (**Figure 4**-Figure supplement 1). The relationship  
639 between  $\ell_{\text{mesa}}$  shows that the wider the mesa, the more saturated the two peak steady states are,  
640 and thus the less efficient competition will be.



## 641 **Turing stability of the Wave-pinning model**

642 We investigate the stability of the wave-pinning model below, and find that with appropriate  
643 parameters, the Wave-pinning model is indeed Turing unstable.

The reaction term of the wave-pinning model (20) has three roots. One is the trivial solution, which is always Turing stable:

$$u = 0, \quad v = M \quad (44)$$

The non-trivial solutions can be obtained from

$$\frac{uv}{1 + \kappa u^2} - 1 = 0 \quad \rightarrow \quad (\kappa + 1)u^2 - Mu + 1 = 0.$$

644 This yields two solutions

$$u = \frac{M \pm \sqrt{M^2 - 4(\kappa + 1)}}{2(\kappa + 1)} \quad v = u - M \quad (45)$$

under the condition

$$M > \sqrt{4(\kappa + 1)}.$$

645 The condition for Turing instability in MCAS models reads as follows (*Mori et al., 2008; Rubinstein*  
646 *et al., 2012*):

$$rF_u - F_v > 0 \quad (46)$$

where  $r = D_v/D_u$  and  $F_u$  and  $F_v$  are the derivatives of  $F(u, v)$  with respect to  $u$ ,

$$F_u = \frac{2uv}{(1 + \kappa u^2)^2} - 1, \quad F_v = \frac{u^2}{1 + \kappa u^2}.$$

Since the homogeneous steady states satisfy

$$\frac{uv}{1 + \kappa u^2} - 1 = 0$$

then condition (46) becomes

$$\frac{2r - u^2}{1 + \kappa u^2} - r > 0 \quad \rightarrow \quad 2r - u^2 > (1 + \kappa u^2)r.$$

647 Therefore, the Turing unstable condition in the non-dimensional system (19, 20) reads:

$$u^2 \left( \kappa + \frac{1}{r} \right) < 1. \quad (47)$$

648 In the Turing-type model at when  $k$  is small, the system is easily Turing unstable due to large ratio  $r$   
649 between the two diffusion constants.

## 650 **Author Contributions**

651 J.-G.C. and D.J.L. developed the concept of this article; J.-G.C. developed the model and conducted  
652 the simulations; J.-G.C., T.C.E., T.P.W., and D.G.S. developed the formal mathematical analysis; J.-G.C.  
653 and D.J.L. drafted the manuscript; All authors contributed in reviewing and editing the manuscript.

## 654 **Acknowledgments**

655 We thank Amy Gladfelter, Stefano Di Talia, Sam Ramirez, Ben Woods, and all members of the  
656 Lew lab for stimulating discussion and comments on the manuscript. This work was supported by  
657 NIH/NIGMS grant GM62300 to D.J.L.

## References

- 658  
659 **Beta C**, Amselem G, Bodenschatz E. A bistable mechanism for directional sensing. *New Journal of Physics*. 2008;  
660 10. <GotoISI>://WOS:000258926600003<http://iopscience.iop.org/article/10.1088/1367-2630/10/8/083015/pdf>,  
661 doi: Artn 083015 10.1088/1367-2630/10/8/083015.
- 662 **Caceres A**, Ye B, Dotti CG. Neuronal polarity: demarcation, growth and commitment. *Curr Opin Cell Biol*. 2012;  
663 24(4):547–53. <http://www.ncbi.nlm.nih.gov/pubmed/22726583>, doi: 10.1016/j.ceb.2012.05.011.
- 664 **Dotti CG**, Sullivan CA, Banker GA. The establishment of polarity by hippocampal neurons in culture. *J Neurosci*.  
665 1988; 8(4):1454–68. <http://www.ncbi.nlm.nih.gov/pubmed/3282038>.
- 666 **Etienne-Manneville S**, Hall A. Rho GTPases in cell biology. *Nature*. 2002; 420(6916):629–35. <http://www.ncbi.nlm.nih.gov/pubmed/12478284>, doi: 10.1038/nature01148.
- 668 **Gierer A**, Meinhardt H. A theory of biological pattern formation. *Kybernetik*. 1972; 12(1):30–9. <http://www.ncbi.nlm.nih.gov/pubmed/4663624>.
- 670 **Gladfelter AS**, Moskow JJ, Zyla TR, Lew DJ. Isolation and characterization of effector-loop mutants of CDC42 in  
671 yeast. *Mol Biol Cell*. 2001; 12(5):1239–55. <http://www.ncbi.nlm.nih.gov/pubmed/11359919>.
- 672 **Goryachev AB**, Leda M. Many roads to symmetry breaking: molecular mechanisms and theoretical models of  
673 yeast cell polarity. *Mol Biol Cell*. 2017; 28(3):370–380. <https://www.ncbi.nlm.nih.gov/pubmed/28137950>, doi:  
674 10.1091/mbc.E16-10-0739.
- 675 **Goryachev AB**, Pokhilko AV. Dynamics of Cdc42 network embodies a Turing-type mechanism of yeast  
676 cell polarity. *FEBS Lett*. 2008; 582(10):1437–43. <http://www.ncbi.nlm.nih.gov/pubmed/18381072>, doi:  
677 10.1016/j.febslet.2008.03.029.
- 678 **Howell AS**, Jin M, Wu CF, Zyla TR, Elston TC, Lew DJ. Negative feedback enhances robustness in  
679 the yeast polarity establishment circuit. *Cell*. 2012; 149(2):322–33. <http://www.ncbi.nlm.nih.gov/pubmed/22500799>[http://ac.els-cdn.com/S009286741200342X/1-s2.0-S009286741200342X-main.pdf?\\_tid=f74503a0-cbd2-11e3-b7b9-0000aacb35f&acdnt=1398359450\\_f4b1ad802ce2a549c1ef0aebbb6292f](http://ac.els-cdn.com/S009286741200342X/1-s2.0-S009286741200342X-main.pdf?_tid=f74503a0-cbd2-11e3-b7b9-0000aacb35f&acdnt=1398359450_f4b1ad802ce2a549c1ef0aebbb6292f), doi:  
681 10.1016/j.cell.2012.03.012.
- 682  
683 **Howell AS**, Savage NS, Johnson SA, Bose I, Wagner AW, Zyla TR, Nijhout HF, Reed MC, Goryachev AB,  
684 Lew DJ. Singularity in polarization: rewiring yeast cells to make two buds. *Cell*. 2009; 139(4):731–  
685 43. <http://www.ncbi.nlm.nih.gov/pubmed/19914166>[http://ac.els-cdn.com/S0092867409013142/1-s2.0-S0092867409013142-main.pdf?\\_tid=7a20f508-ca58-11e3-bfb8-0000aacb35f&acdnt=1398196890\\_bc36d21296f6392c71573cfe223c22e5](http://ac.els-cdn.com/S0092867409013142/1-s2.0-S0092867409013142-main.pdf?_tid=7a20f508-ca58-11e3-bfb8-0000aacb35f&acdnt=1398196890_bc36d21296f6392c71573cfe223c22e5), doi: 10.1016/j.cell.2009.10.024.
- 686  
687  
688 **Jilkine A**, Edelstein-Keshet L. A comparison of mathematical models for polarization of single eukaryotic cells in  
689 response to guided cues. *PLoS Comput Biol*. 2011; 7(4):e1001121. <http://www.ncbi.nlm.nih.gov/pubmed/21552548>, doi: 10.1371/journal.pcbi.1001121.
- 690  
691 **Knechtle P**, Dietrich F, Philippson P. Maximal polar growth potential depends on the polarisome component  
692 AgSpa2 in the filamentous fungus *Ashbya gossypii*. *Mol Biol Cell*. 2003; 14(10):4140–54. <http://www.ncbi.nlm.nih.gov/pubmed/12937275>, doi: 10.1091/mbc.E03-03-0167.
- 693  
694 **Kuo CC**, Savage NS, Chen H, Wu CF, Zyla TR, Lew DJ. Inhibitory GEF Phosphorylation Provides Negative  
695 Feedback in the Yeast Polarity Circuit. *Curr Biol*. 2014; 24(7):753–9. <http://www.ncbi.nlm.nih.gov/pubmed/24631237>[http://ac.els-cdn.com/S0960982214001924/1-s2.0-S0960982214001924-main.pdf?\\_tid=4cb67bc6-ca56-11e3-bbab-0000aab0f02&acdnt=1398195955\\_cceaf7bb3f68407c3dd0a3af7ef2ce06](http://ac.els-cdn.com/S0960982214001924/1-s2.0-S0960982214001924-main.pdf?_tid=4cb67bc6-ca56-11e3-bbab-0000aab0f02&acdnt=1398195955_cceaf7bb3f68407c3dd0a3af7ef2ce06), doi:  
696 10.1016/j.cub.2014.02.024.
- 697  
698  
699 **Marcon L**, Diego X, Sharpe J, Muller P. High-throughput mathematical analysis identifies Turing networks for  
700 patterning with equally diffusing signals. *Elife*. 2016; 5. <http://www.ncbi.nlm.nih.gov/pubmed/27058171><http://www.ncbi.nlm.nih.gov/pmc/articles/PMC4922859/pdf/elife-14022.pdf>, doi: 10.7554/eLife.14022.
- 701  
702 **Mori Y**, Jilkine A, Edelstein-Keshet L. Wave-pinning and cell polarity from a bistable reaction-diffusion system.  
703 *Biophys J*. 2008; 94(9):3684–97. <http://www.ncbi.nlm.nih.gov/pubmed/18212014><http://www.ncbi.nlm.nih.gov/pmc/articles/PMC2292363/pdf/3684.pdf>, doi: 10.1529/biophysj.107.120824.
- 704  
705 **Mori Y**, Jilkine A, Edelstein-Keshet L. Asymptotic and Bifurcation Analysis of Wave-Pinning in a Reaction-Diffusion  
706 Model for Cell Polarization. *SIAM J Appl Math*. 2011; 71(4):1401–1427. <http://www.ncbi.nlm.nih.gov/pubmed/22171122>, doi: 10.1137/10079118X.
- 707

- 708 **Otsuji M**, Ishihara S, Co C, Kaibuchi K, Mochizuki A, Kuroda S. A mass conserved reaction-diffusion system  
709 captures properties of cell polarity. *PLoS Comput Biol.* 2007; 3(6):e108. [http://www.ncbi.nlm.nih.gov/pubmed/](http://www.ncbi.nlm.nih.gov/pubmed/17559299)  
710 [17559299](http://www.ncbi.nlm.nih.gov/pmc/articles/PMC1892603/pdf/pcbi.0030108.pdf)<http://www.ncbi.nlm.nih.gov/pmc/articles/PMC1892603/pdf/pcbi.0030108.pdf>, doi: 10.1371/jour-  
711 [nal.pcbi.0030108](http://www.ncbi.nlm.nih.gov/pmc/articles/PMC1892603/pdf/pcbi.0030108.pdf).
- 712 **Otsuji M**, Terashima Y, Ishihara S, Kuroda S, Matsushima K. A Conceptual Molecular Network for Chemotactic  
713 Behaviors Characterized by Feedback of Molecules Cycling Between the Membrane and the Cytosol. *Science*  
714 *Signaling.* 2010; 3(152). <GotoISI>://WOS:000285295000003[http://stke.sciencemag.org/content/sigtrans/3/](http://stke.sciencemag.org/content/sigtrans/3/152/ra89.full.pdf)  
715 [152/ra89.full.pdf](http://stke.sciencemag.org/content/sigtrans/3/152/ra89.full.pdf), doi: ARTN ra89 10.1126/scisignal.2001056.
- 716 **Ozbudak EM**, Becskei A, van Oudenaarden A. A system of counteracting feedback loops regulates Cdc42p  
717 activity during spontaneous cell polarization. *Dev Cell.* 2005; 9(4):565–71. [http://www.ncbi.nlm.nih.gov/](http://www.ncbi.nlm.nih.gov/pubmed/16198298)  
718 [pubmed/16198298](http://www.ncbi.nlm.nih.gov/pubmed/16198298)[http://ac.els-cdn.com/S1534580705003345/1-s2.0-S1534580705003345-main.pdf?\\_tid=](http://ac.els-cdn.com/S1534580705003345/1-s2.0-S1534580705003345-main.pdf?_tid=2221adca-5adb-11e4-9888-0000aacb361&acdnat=1414085974_5295f7d6a348ad891e90dd3c32496798)  
719 [2221adca-5adb-11e4-9888-0000aacb361&acdnat=1414085974\\_5295f7d6a348ad891e90dd3c32496798](http://ac.els-cdn.com/S1534580705003345/1-s2.0-S1534580705003345-main.pdf?_tid=2221adca-5adb-11e4-9888-0000aacb361&acdnat=1414085974_5295f7d6a348ad891e90dd3c32496798),  
720 doi: 10.1016/j.devcel.2005.08.014.
- 721 **Ramirez SA**, Raghavachari S, Lew DJ. Dendritic spine geometry can localize GTPase signaling in neurons. *Mol*  
722 *Biol Cell.* 2015; 26(22):4171–81. <http://www.ncbi.nlm.nih.gov/pubmed/26337387><http://www.ncbi.nlm.nih.gov/pmc/articles/PMC4710246/pdf/4171.pdf>, doi: 10.1091/mbc.E15-06-0405.
- 724 **Rubinstein B**, Slaughter BD, Li R. Weakly nonlinear analysis of symmetry breaking in cell polarity models. *Phys*  
725 *Biol.* 2012; 9(4):045006. <http://www.ncbi.nlm.nih.gov/pubmed/22871896>[http://iopscience.iop.org/article/10.](http://iopscience.iop.org/article/10.1088/1478-3975/9/4/045006/pdf)  
726 [1088/1478-3975/9/4/045006/pdf](http://iopscience.iop.org/article/10.1088/1478-3975/9/4/045006/pdf), doi: 10.1088/1478-3975/9/4/045006.
- 727 **Turing AM**. The Chemical Basis of Morphogenesis. *Philosophical Transactions of the Royal Society of Lon-*  
728 *don Series B-Biological Sciences.* 1952; 237(641):37–72. <GotoISI>://WOS:A1952YF90500001[http://rspb.](http://rspb.royalsocietypublishing.org/content/royptb/237/641/37.full.pdf)  
729 [royalsocietypublishing.org/content/royptb/237/641/37.full.pdf](http://rspb.royalsocietypublishing.org/content/royptb/237/641/37.full.pdf), doi: Doi 10.1098/Rstb.1952.0012.
- 730 **Wedlich-Soldner R**, Wai SC, Schmidt T, Li R. Robust cell polarity is a dynamic state established by cou-  
731 pling transport and GTPase signaling. *J Cell Biol.* 2004; 166(6):889–900. [https://www.ncbi.nlm.nih.](https://www.ncbi.nlm.nih.gov/pubmed/15353546)  
732 [gov/pubmed/15353546](https://www.ncbi.nlm.nih.gov/pubmed/15353546)<https://www.ncbi.nlm.nih.gov/pmc/articles/PMC2172129/pdf/200405061.pdf>, doi:  
733 [10.1083/jcb.200405061](https://www.ncbi.nlm.nih.gov/pmc/articles/PMC2172129/pdf/200405061.pdf).
- 734 **Wu CF**, Chiou JG, Minakova M, Woods B, Tsygankov D, Zyla TR, Savage NS, Elston TC, Lew DJ. Role of  
735 competition between polarity sites in establishing a unique front. *Elife.* 2015; 4. [http://www.ncbi.nlm.](http://www.ncbi.nlm.nih.gov/pubmed/26523396)  
736 [nih.gov/pubmed/26523396](http://www.ncbi.nlm.nih.gov/pubmed/26523396)<http://www.ncbi.nlm.nih.gov/pmc/articles/PMC4728132/pdf/elife-11611.pdf>, doi:  
737 [10.7554/eLife.11611](http://www.ncbi.nlm.nih.gov/pmc/articles/PMC4728132/pdf/elife-11611.pdf).
- 738 **Wu CF**, Lew DJ. Beyond symmetry-breaking: competition and negative feedback in GTPase regulation. *Trends Cell*  
739 *Biol.* 2013; 23(10):476–83. <http://www.ncbi.nlm.nih.gov/pubmed/23731999>, doi: 10.1016/j.tcb.2013.05.003.
- 740 **Yang Z**. Cell polarity signaling in Arabidopsis. *Annu Rev Cell Dev Biol.* 2008; 24:551–75. [http://www.ncbi.nlm.nih.](http://www.ncbi.nlm.nih.gov/pubmed/18837672)  
741 [gov/pubmed/18837672](http://www.ncbi.nlm.nih.gov/pubmed/18837672)<http://www.ncbi.nlm.nih.gov/pmc/articles/PMC2739732/pdf/nihms-128002.pdf>, doi:  
742 [10.1146/annurev.cellbio.23.090506.123233](http://www.ncbi.nlm.nih.gov/pmc/articles/PMC2739732/pdf/nihms-128002.pdf).
- 743 **Ziman M**, Johnson DI. Genetic evidence for a functional interaction between *Saccharomyces cerevisiae*  
744 CDC24 and CDC42. *Yeast.* 1994; 10(4):463–74. <https://www.ncbi.nlm.nih.gov/pubmed/7941732>[http://onlinelibrary.wiley.com/store/10.1002/yea.320100405/asset/320100405ftp.pdf?v=1&t=j20n9fsu&s=](http://onlinelibrary.wiley.com/store/10.1002/yea.320100405/asset/320100405ftp.pdf?v=1&t=j20n9fsu&s=7f00046423fbf89ac79f8bc0c8ee1c1b5c884848)  
745 [7f00046423fbf89ac79f8bc0c8ee1c1b5c884848](http://onlinelibrary.wiley.com/store/10.1002/yea.320100405/asset/320100405ftp.pdf?v=1&t=j20n9fsu&s=7f00046423fbf89ac79f8bc0c8ee1c1b5c884848), doi: 10.1002/yea.320100405.

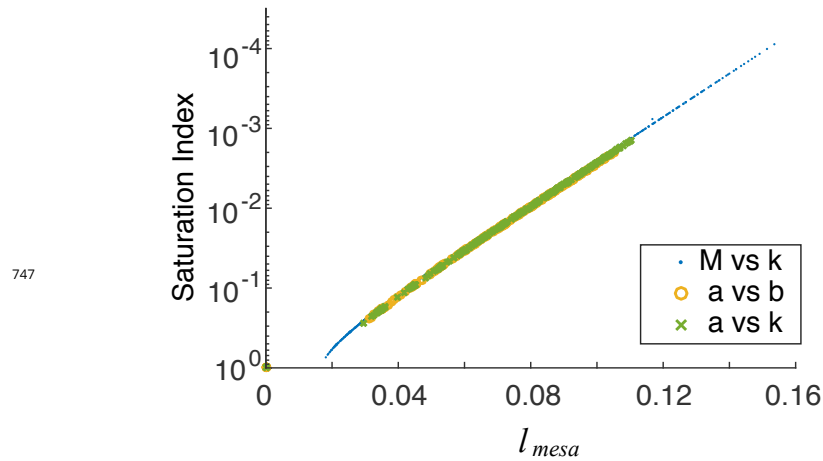

**Figure 4-Figure supplement 1.** Peak width,  $\ell_{\text{mesa}}$ , is a robust indicator of saturation over a broad range of system parameters. Data points collected from simulations in **Figure 4A**.

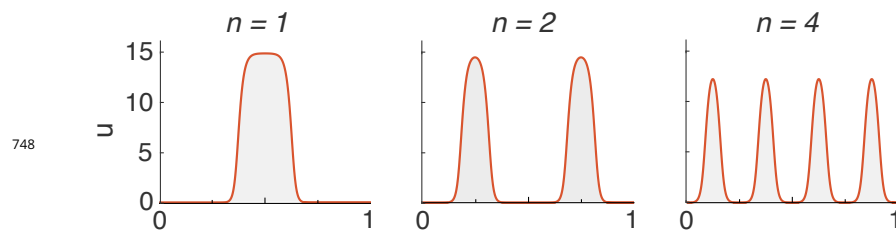

**Figure 9-Figure supplement 1.** An MCAS system with a given set of parameters can yield solutions of different periodicities  $n$ .

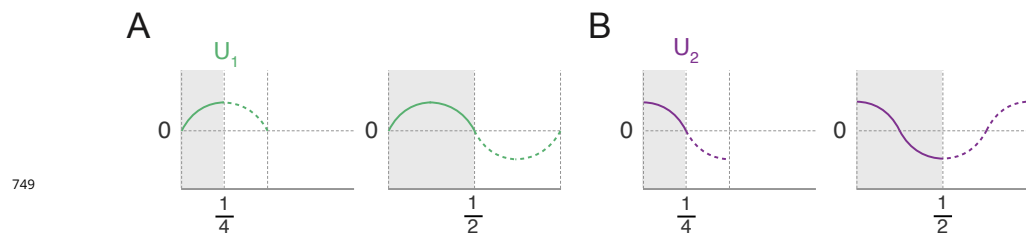

**Figure 9-Figure supplement 2.** Construction of the two forms of the eigenmode  $U(x)$  using even and odd extensions of the quarter-domain solutions  $U_1(x)$  (A) and  $U_2(x)$  (B) for a two-peak solution  $u_{ss}(x)$ .

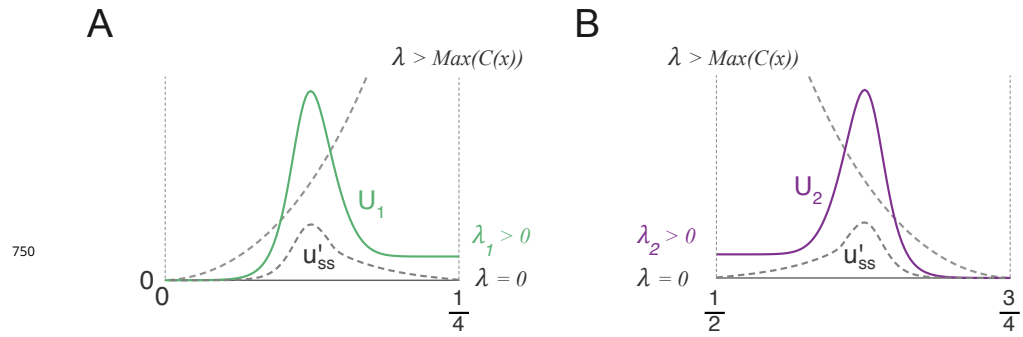

**Figure 9-Figure supplement 3.** Schematic representations of the shooting method constructions for the  $\lambda_1$  (shooting from  $x = 0$  to  $x = \frac{1}{4}$ ) (A), and the  $\lambda_2$  (shooting from  $x = \frac{3}{4}$  to  $x = \frac{1}{2}$ ) eigenmodes (B), which represent competition and merging modes respectively.

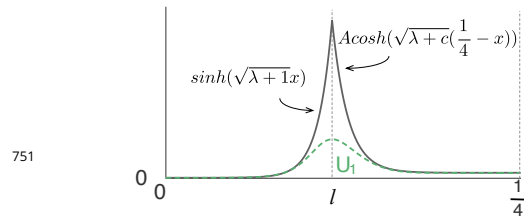

**Figure 9-Figure supplement 4.** Construction of the approximate  $U_1(x)$  eigenfunction using hyperbolic functions with a midpoint boundary condition (36) at position  $l$ .
